# Supplementary material
Source: Research Square preprint supplement (doi:10.21203/rs.3.rs-9285543/v1)
Supplement: Supplementary file 1 [file c4d8d8f7b47bbe1eb2a339a3.docx]

**A SP1-Driven Translational-Proteostatic Checkpoint Modulates Autophagy-Proteasome Network**

Junyu Chen1,2, Amina Hamzatova2, Yi Zhang3, Xiaoxue Fu4, Douglas M.D. Souza2,4, Juan Yuan6, Xiaoting Chen7, David A. Hart8, Weinan Zeng1, Zongke Zhou1,*,§ and Aisha S. Ahmed2,*,§

1.Department of Orthopedics, Orthopedic Research Institute, West China Hospital, Sichuan University, #37 Guoxue Road, Chengdu, 610041, China.

2.Department of Molecular Medicine and Surgery, Karolinska Institutet, Stockholm 17164, Sweden.

3.Department of Medicine, Luoyang Polytechnic, Luoyang, Henan, China.

4.Department of Pharmacology, School of Medical Sciences, University of Campinas, São Paulo, Brazil.

5.Department of Orthopedics, Xinqiao Hospital, Chongqing, China

6.Department of Cell and Molecular Biology, Karolinska Institutet, Stockholm, 17176, Sweden.

7.Animal Experimental Center, West China Hospital, Sichuan University, Chengdu, China.

8.Department of Surgery, Faculty of Kinesiology, and McCaig Institute for Bone & Joint Health, University of Calgary, Calgary, Alberta, Canada.

**Corresponding author:**

Zongke Zhou, MD, PhD. ([zhouzongke@scu.edu.com](mailto:zhouzongke@scu.edu.com), +86 18980601028 )

Department of Orthopedics, Orthopedic Research Institute, West China Hospital, Sichuan University, #37 Guoxue Road, Chengdu, 610041, China

Aisha S. Ahmed PhD. [(aisha.ahmed@ki.se](mailto:(aisha.ahmed@ki.se), +46 735056601)

Department of Molecular Medicine and Surgery, Karolinska Institutet, 17176 Stockholm, Sweden

* Shared corresponding authorship and Aisha S. Ahmed is the major corresponding author

§ Shared last authorship and Aisha S. Ahmed is the major last author

**Fig.S1.**


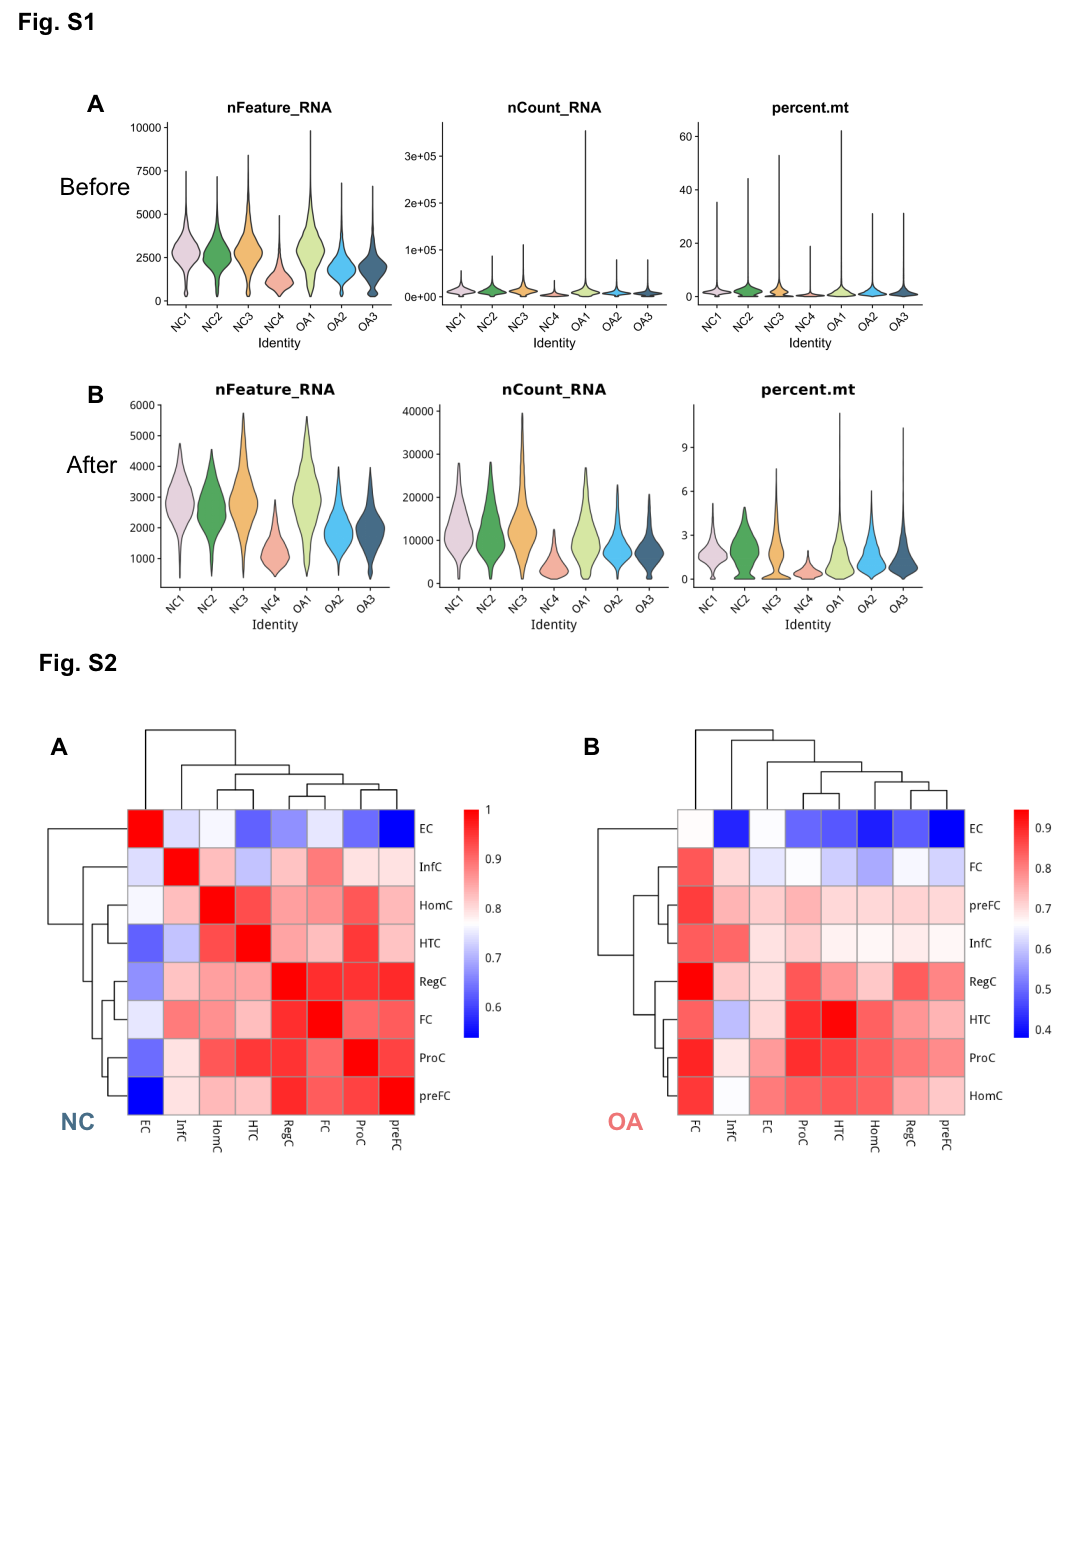


**Fig.S1.** Quality control for the single-cell RNA sequencing.

**Fig.S2.**


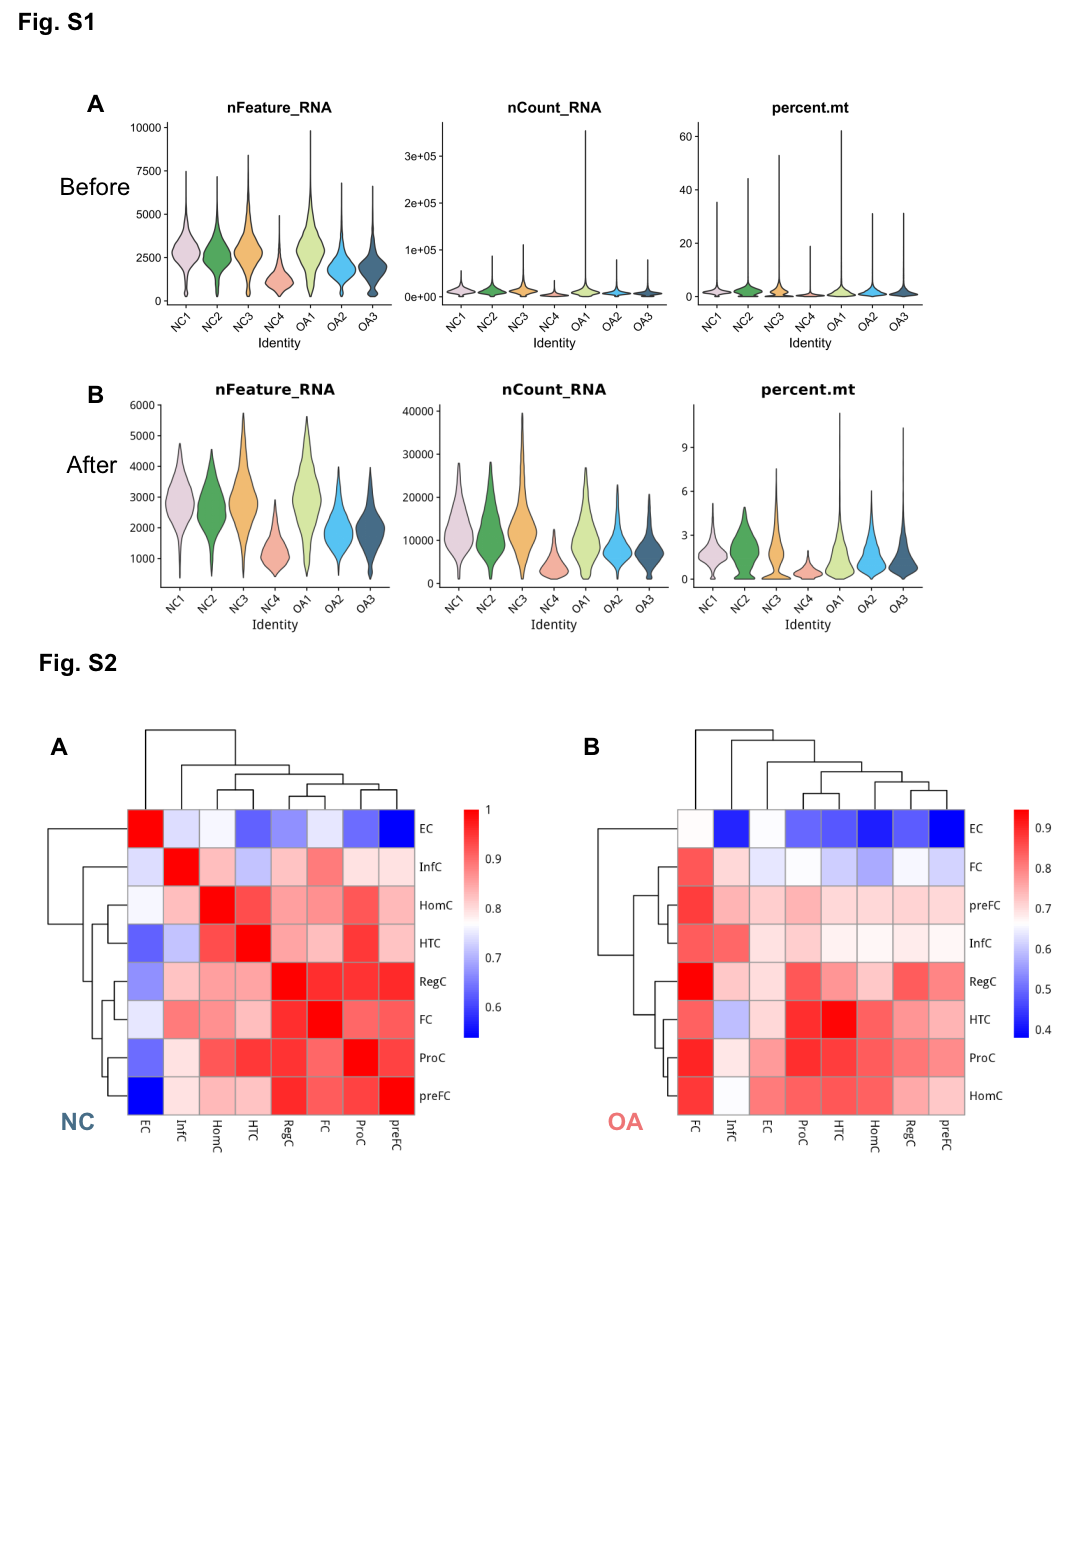


**Fig.S2.** (**A**) Pearson correlation analysis among all cell subpopulations across merged samples. (**B**) Pearson correlation between cell subpopulations in OA samples (X-axis) and those in the NC group.

**Fig.S3.**


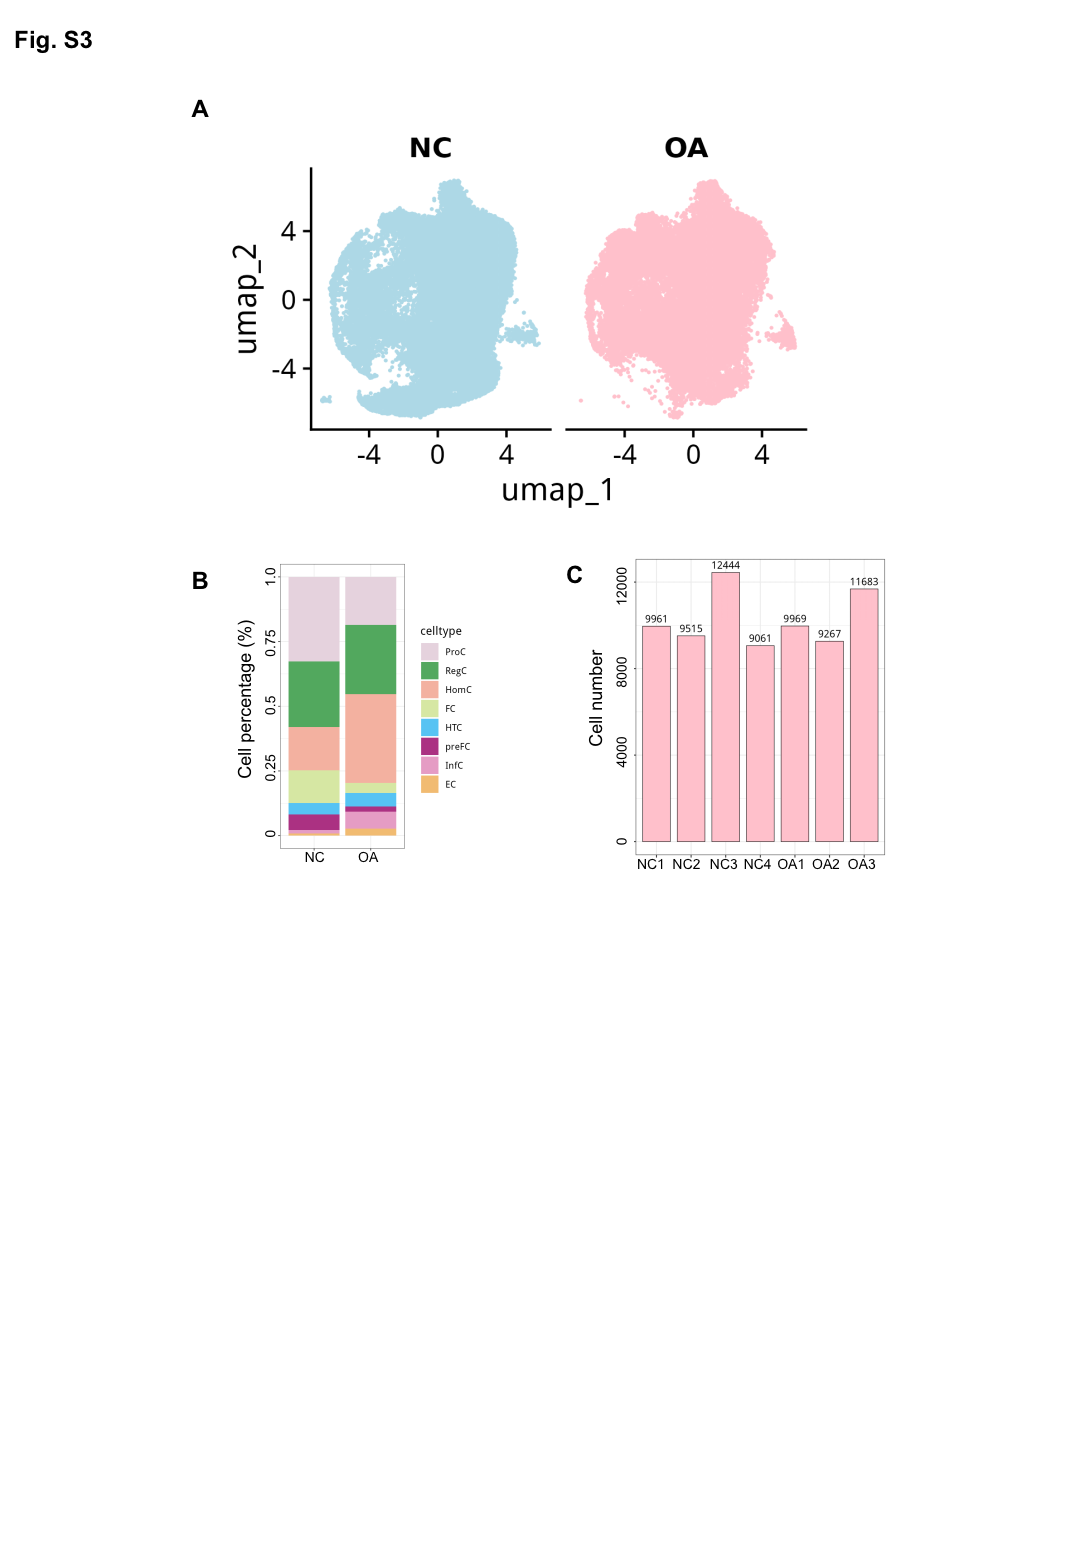


**Fig.S3. Overview of cellular and genetic landscape based on single-cell sequencing.** (**A**) Overall cell landsacpe across all the samples. (**B**) Overall gene detection rates were comparable between NC and OA samples. (**C**) Overall gene account were comparable between NC and OA samples.

Fig.S4


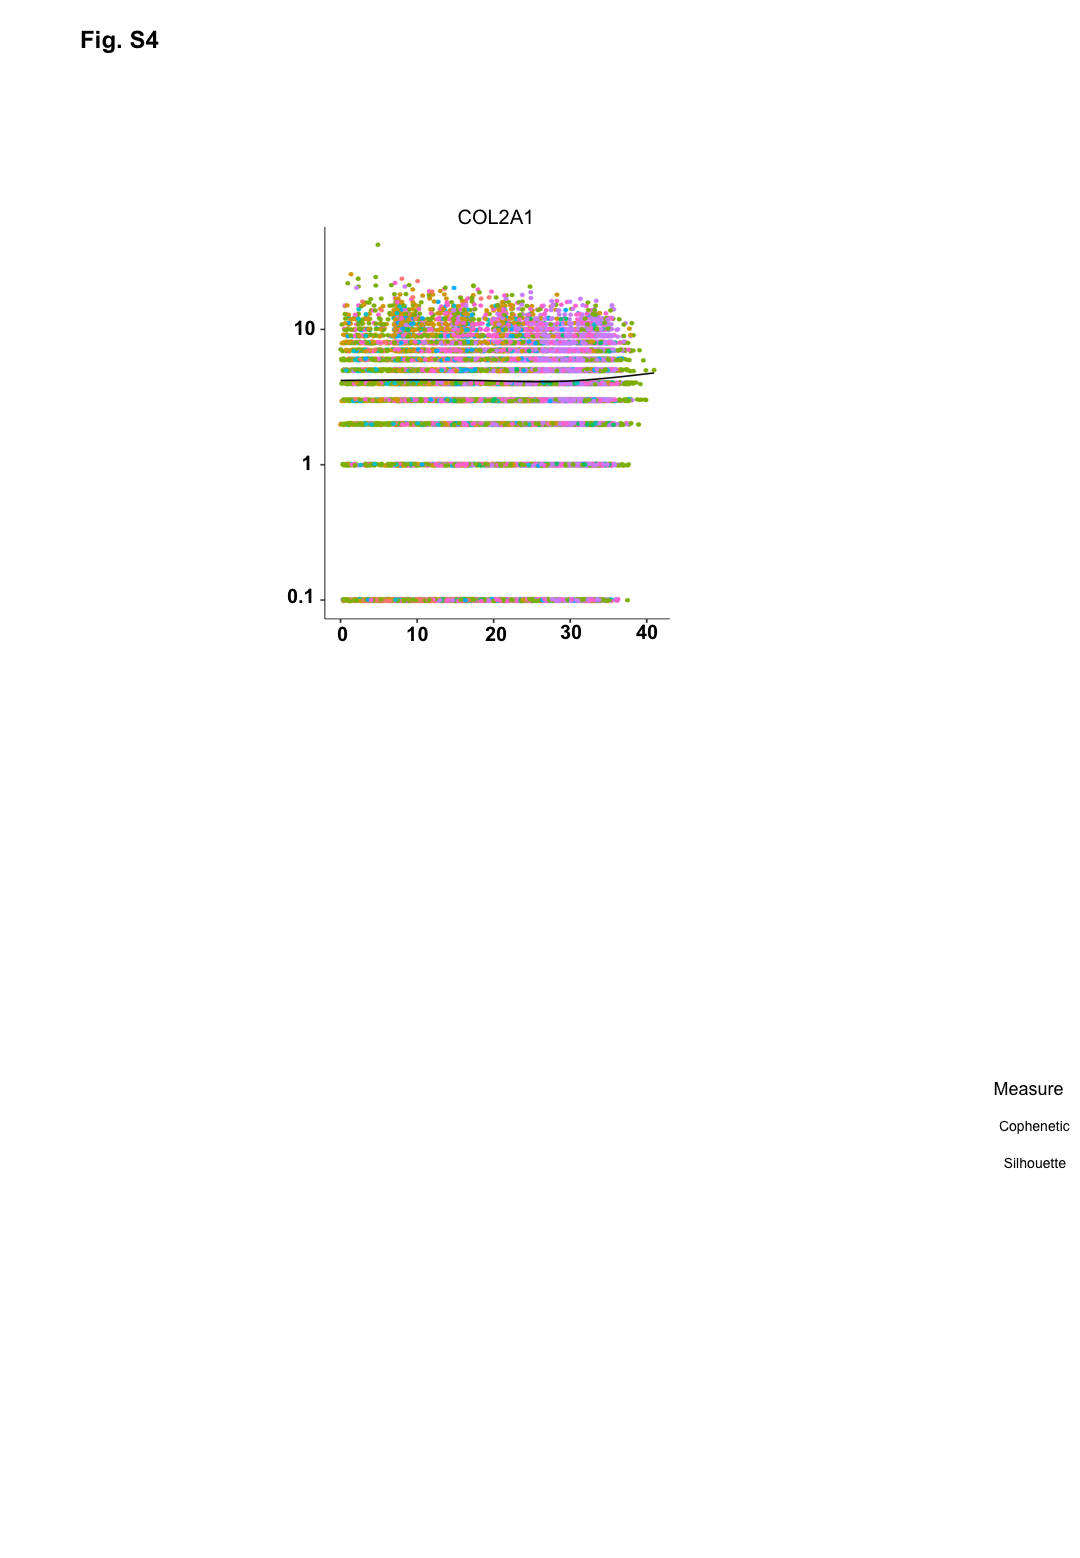


**Fig.S4. Top gene (*COL2A1*) consistently identified across pseudotime models.**

Fig.S5


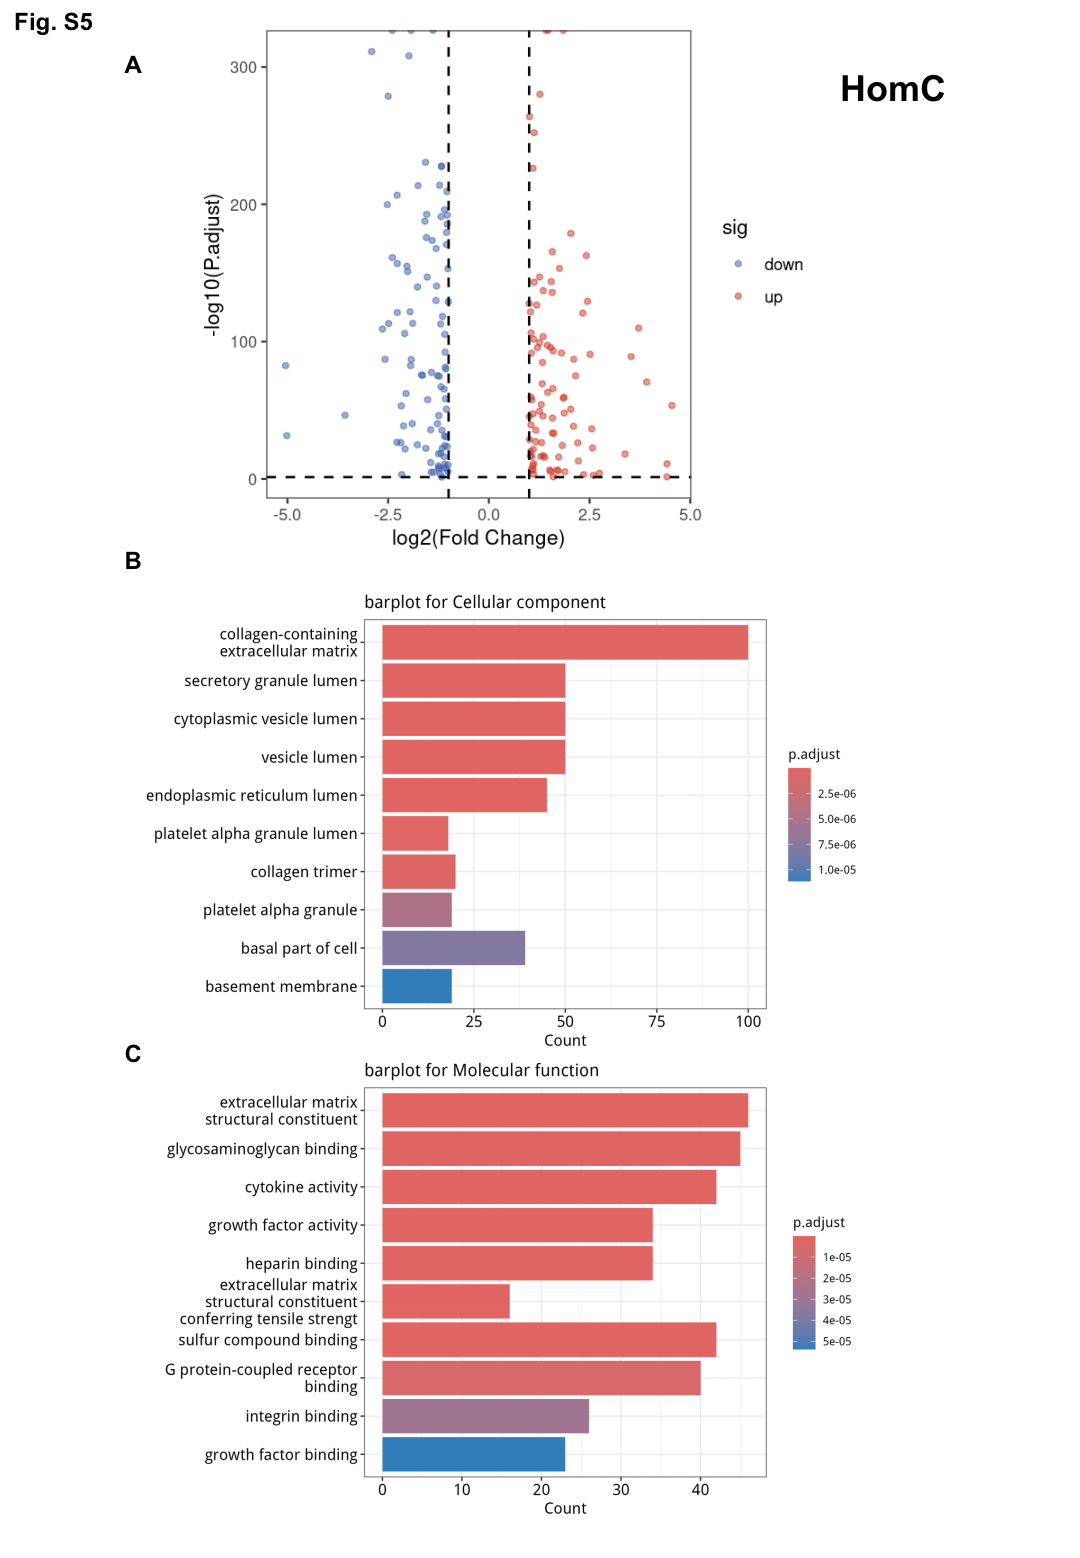


**Fig.S5. Overview of cellular and molecular function of HomC.** (**A**) Differentially expressed genes (DEGs) between NC and OA samples. Red dots mean up-regulated genes, blue dots mean down-regulated gens and gray dots present genes with no-significance. Fold change > 2 and < 0.5, together with *p* < 0.05 was set as statistical significance. Enriched significant (**B**) cellular components and (C) molecular functions between different groups based on the DEGs.

**Fig.S6.**


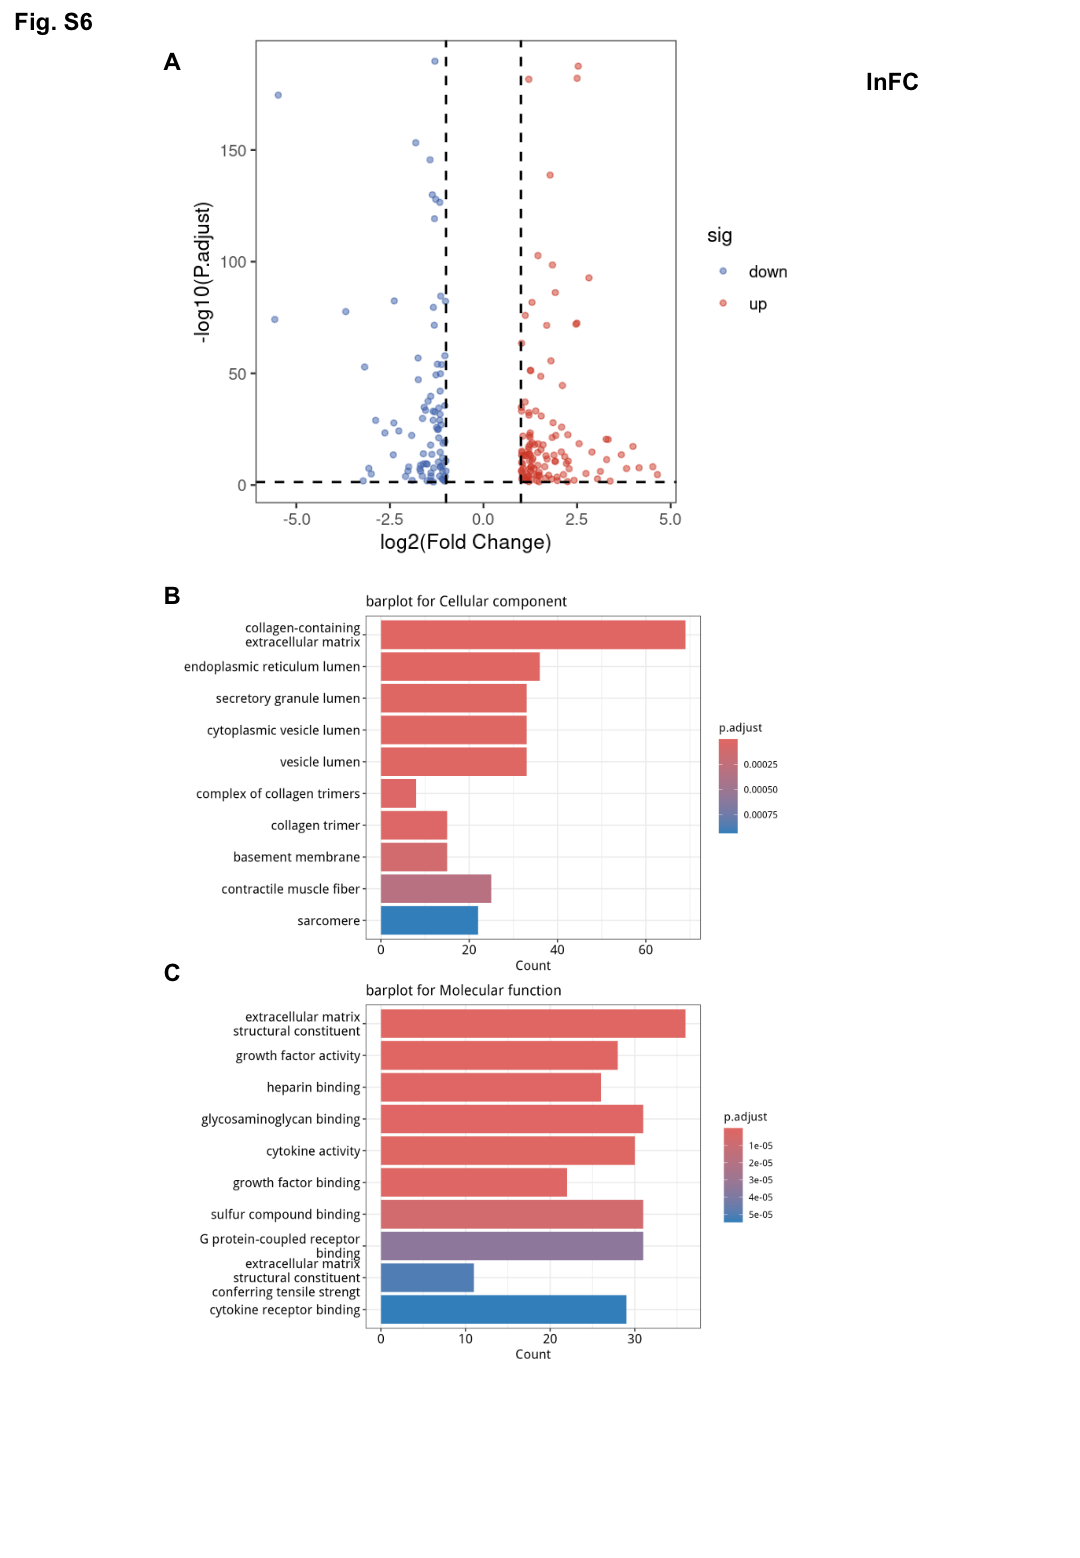


**Fig.S5. Overview of cellular and molecular function of InFC.** (**A**) Differentially expressed genes (DEGs) between NC and OA samples. Red dots mean up-regulated genes, blue dots mean down-regulated gens and gray dots present genes with no-significance. Fold change > 2 and < 0.5, together with *p* < 0.05 was set as statistical significance. Enriched significant (**B**) cellular components and (C) molecular functions between different groups based on the DEGs.

**Fig.S7.**


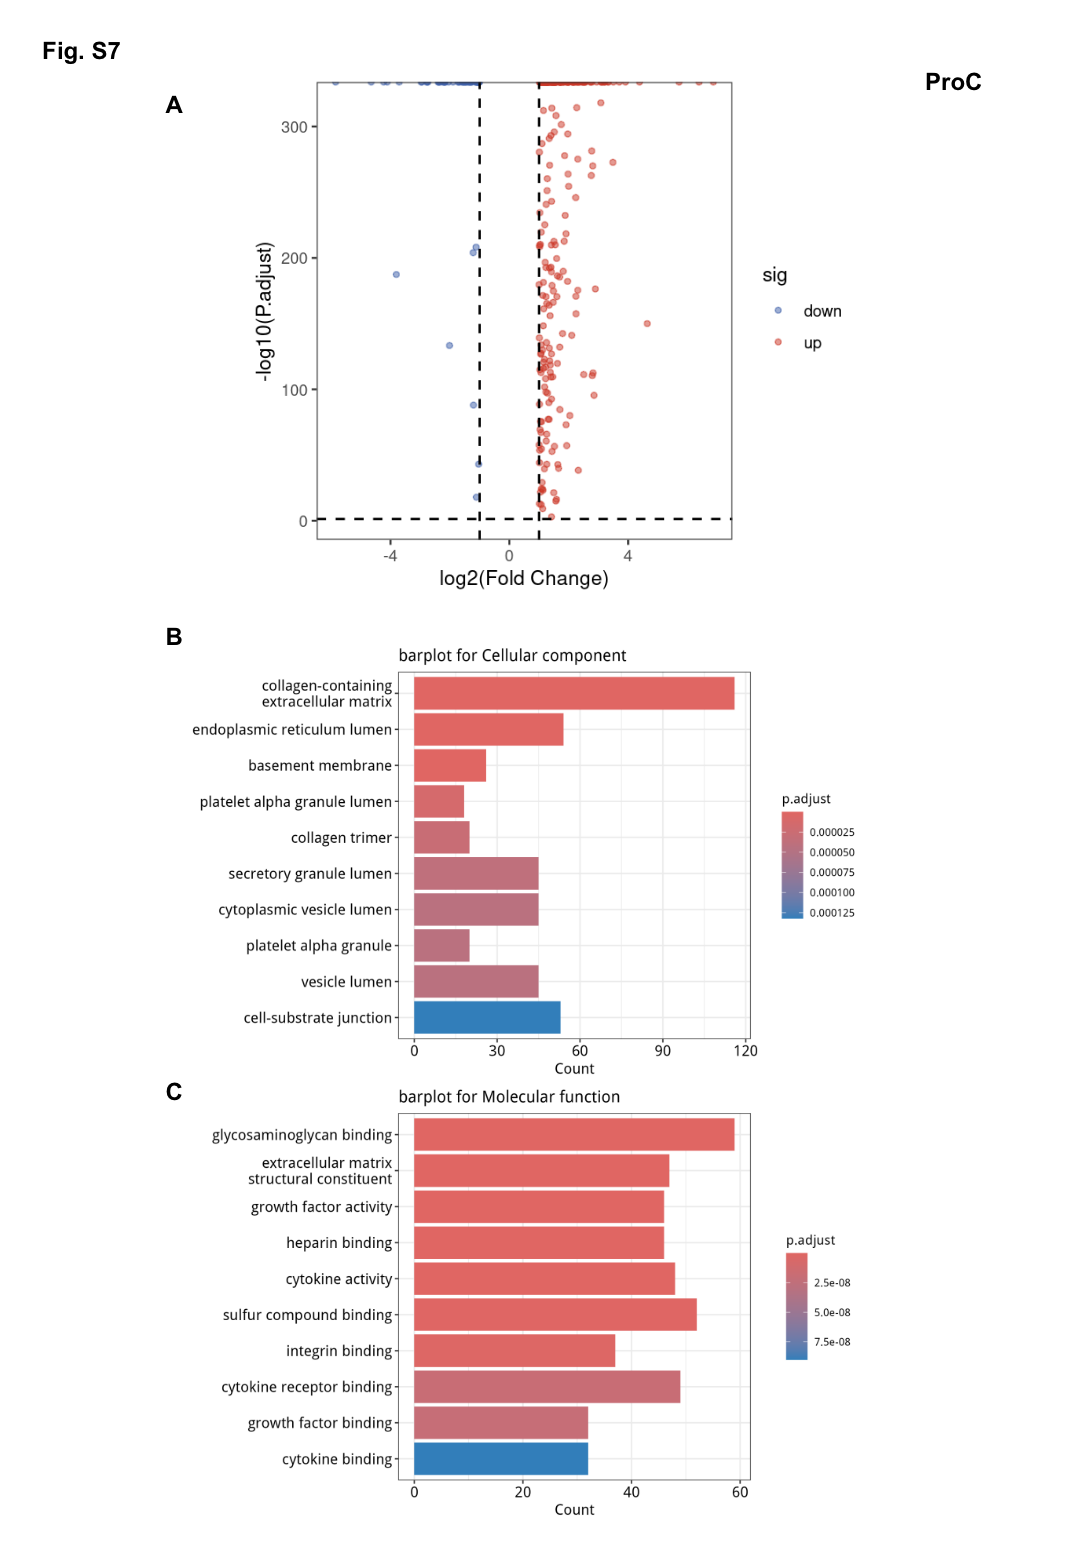


**Fig.S7. Overview of cellular and molecular function of ProC.** (**A**) Differentially expressed genes (DEGs) between NC and OA samples. Red dots mean up-regulated genes, blue dots mean down-regulated gens and gray dots present genes with no-significance. Fold change > 2 and < 0.5, together with *p* < 0.05 was set as statistical significance. Enriched significant (**B**) cellular components and (C) molecular functions between different groups based on the DEGs.

Fig.S8


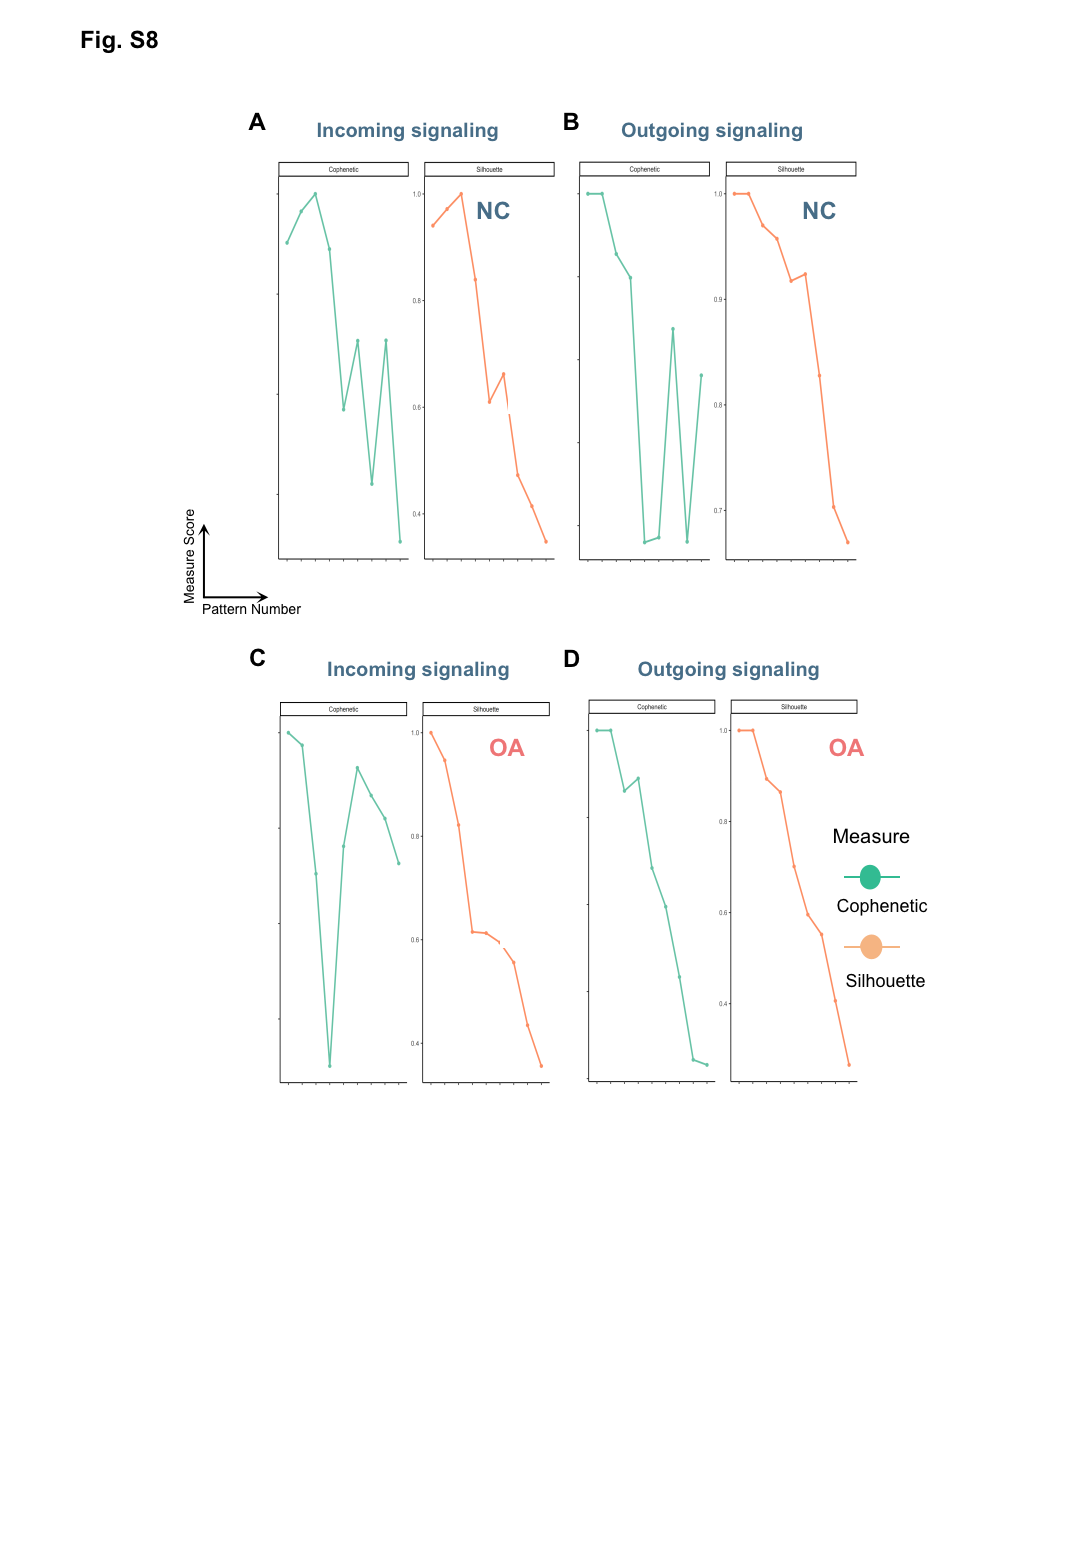


**Fig.S8. Overview of signaling arrangement across all the samples.** (**A**) Incoming signaling measurement among normal samples. (**B**) Outgoing signaling measurement among normal samples. (**C**) Incoming signaling measurement among OA samples. (**D**) Outgoing signaling measurement among OA samples. Green line means cophenetic while yellow line represents silhouette.

**Fig.S9.**


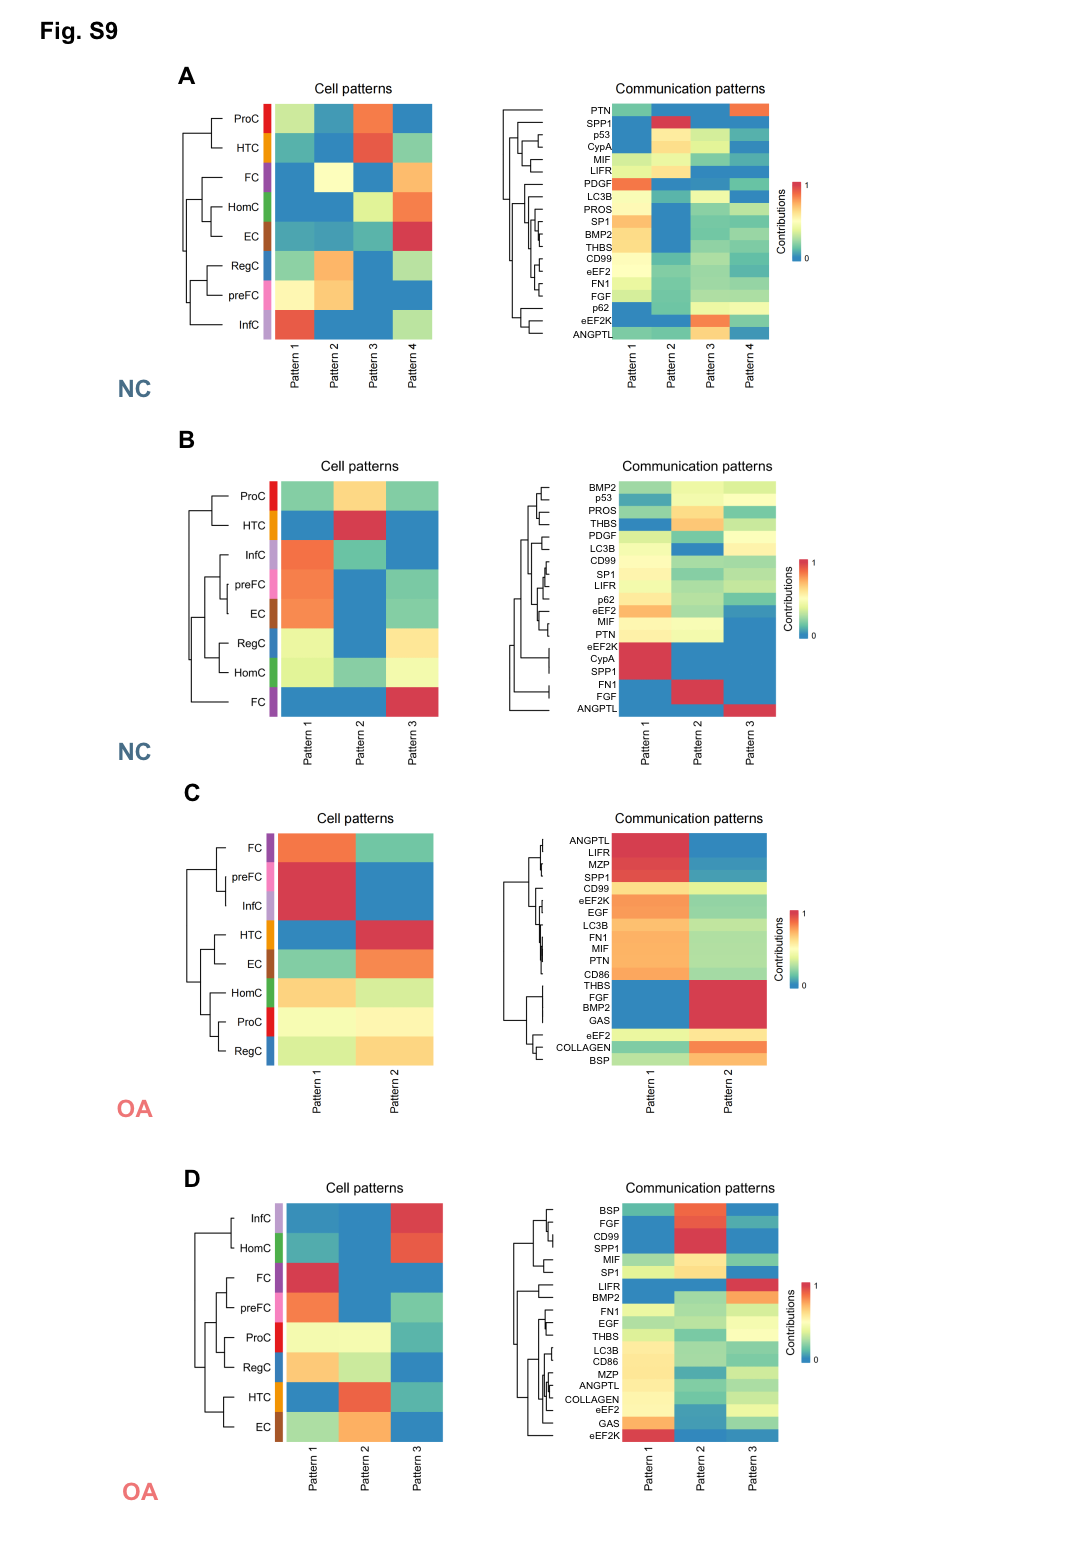


**Fig.S9. Overview of signaling patterns across all the samples based on top DEGs.** (**A**) Incoming signaling patterns among normal samples. (**B**) Outgoing signaling patterns among normal samples. (**C**) Incoming signaling patterns among OA samples. (**D**) Outgoing signaling patterns among OA samples.

**Fig.S10.**


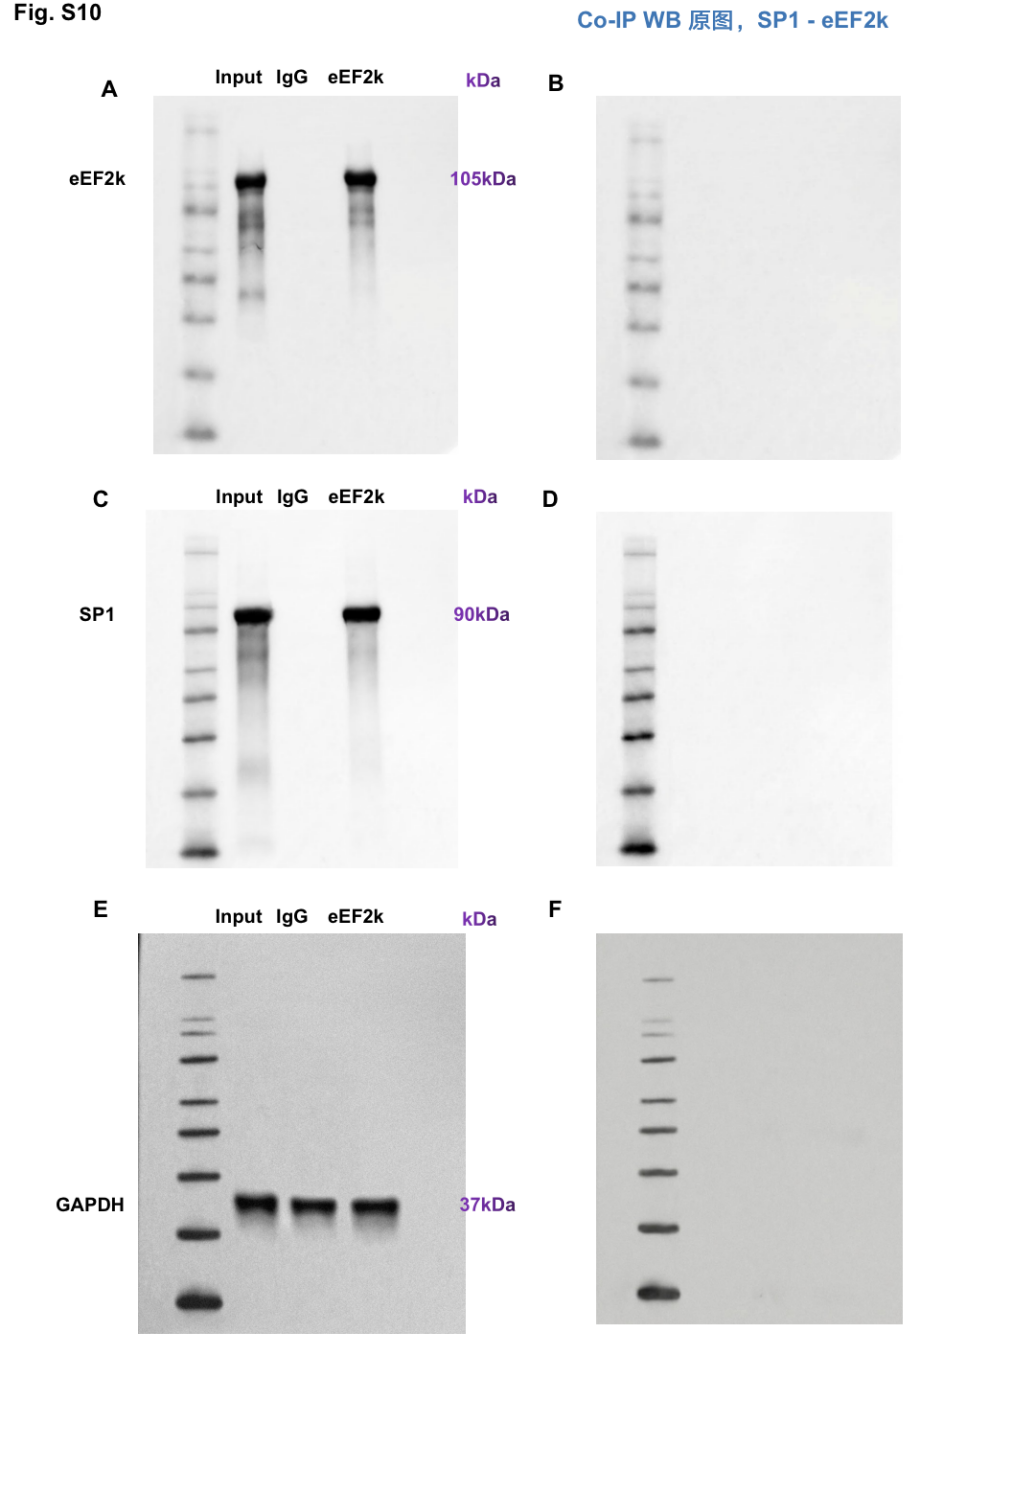


**Fig.S10. Original western blot membrane of protein-to-protein interaction between SP1 and eEF2K based on Co-IP.**

**Fig.S11.**


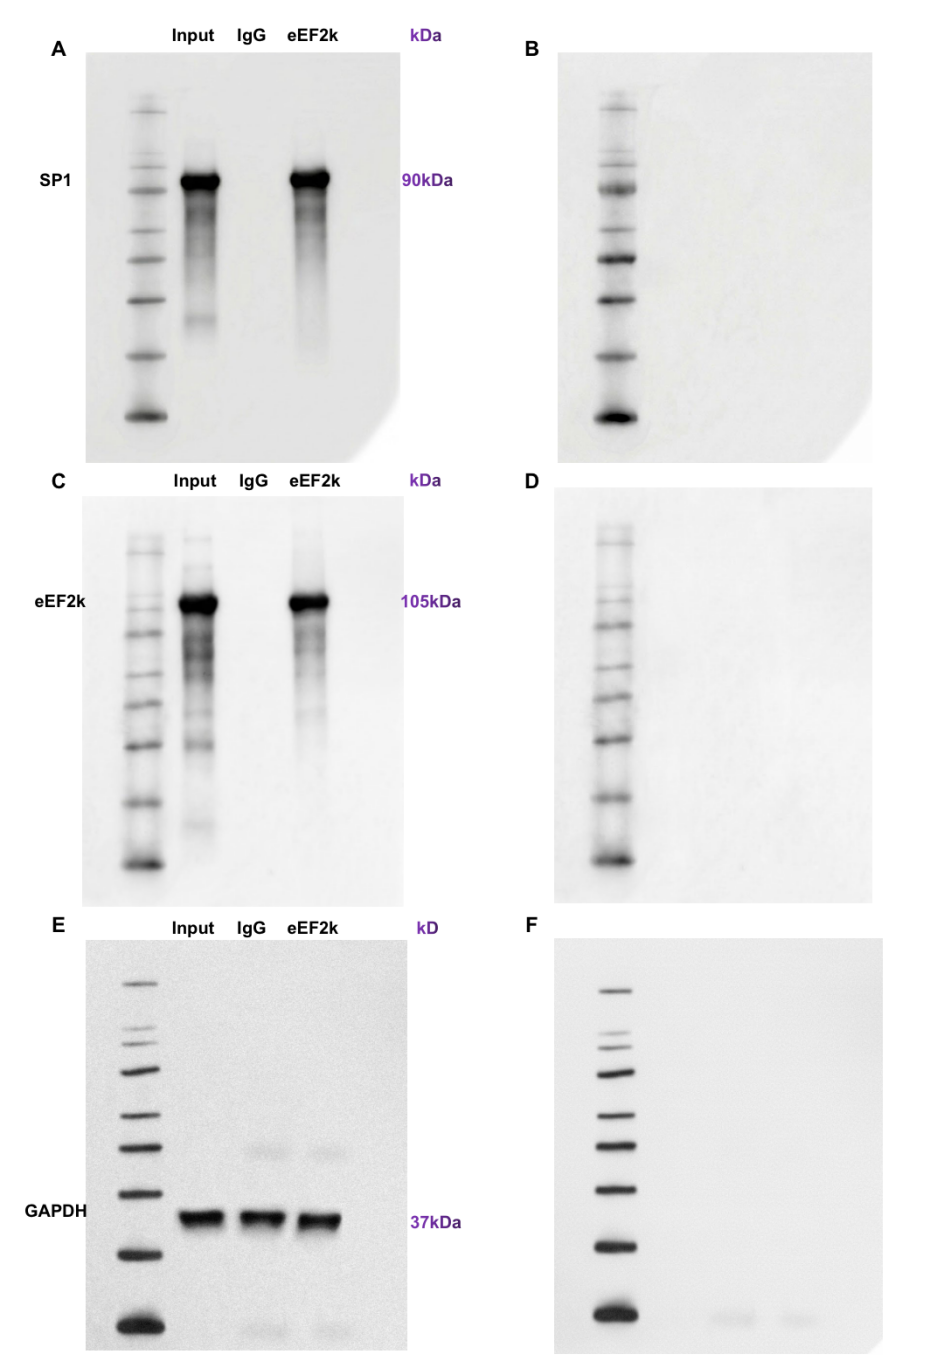


**Fig.S11. Original western blot membrane of protein-to-protein interaction between SP1 and eEF2K based on Co-IP.**

**Fig.S12.**


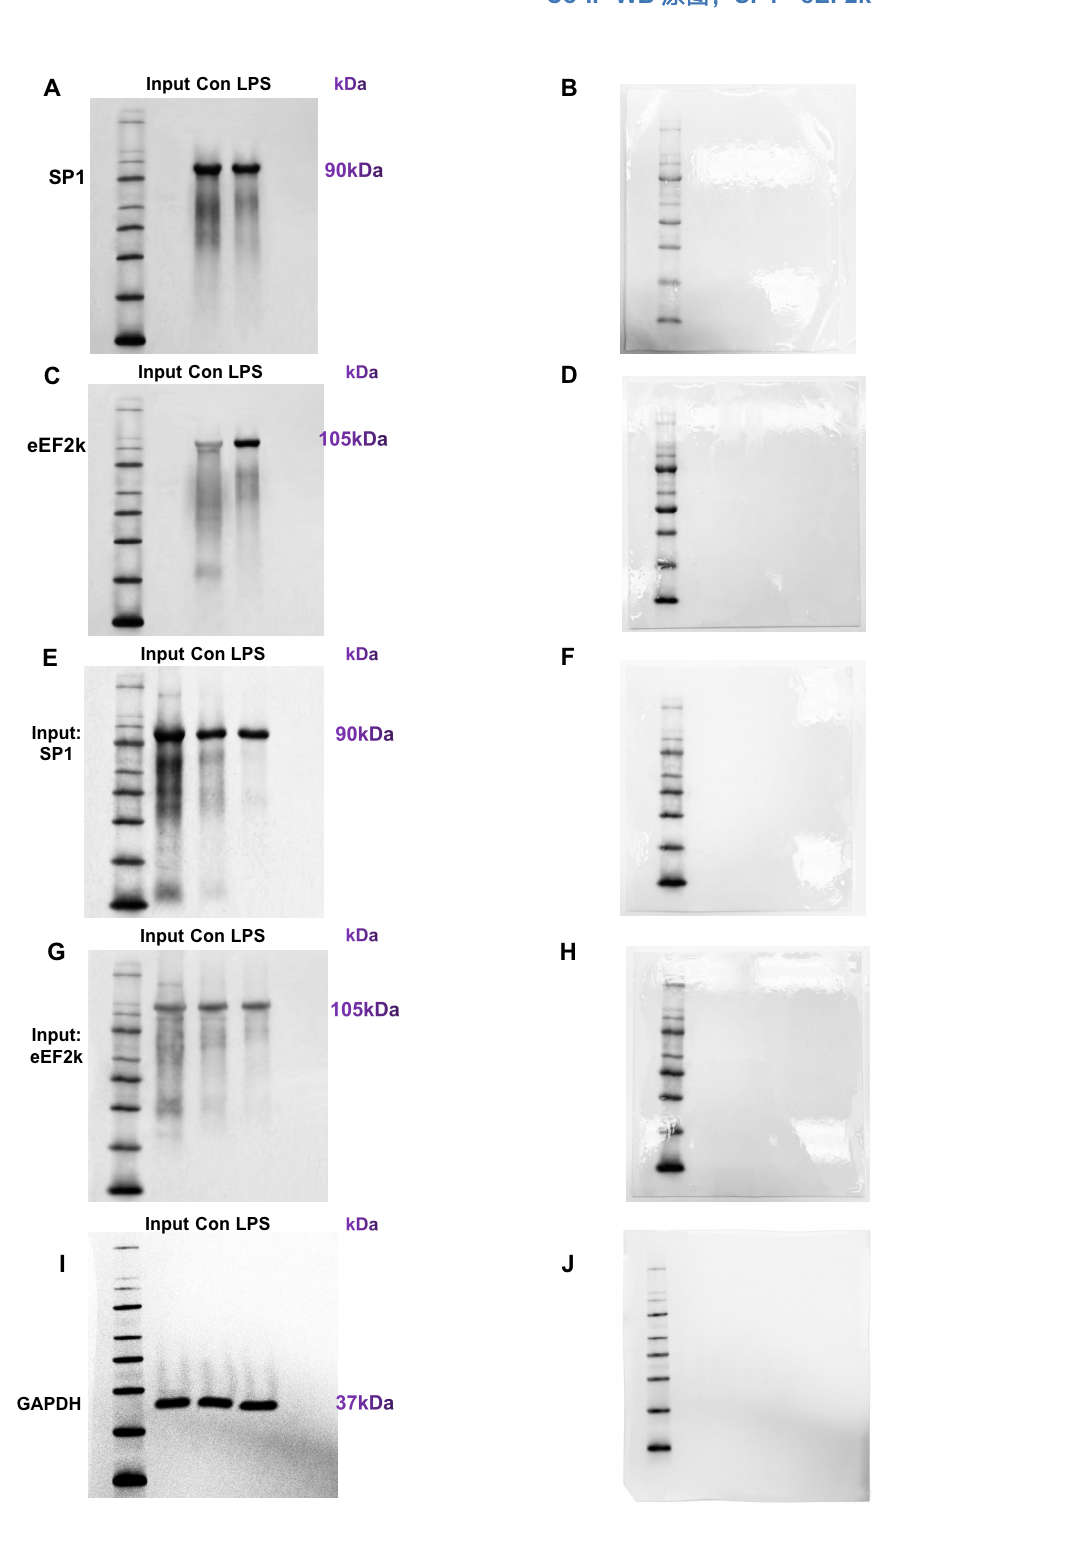


**Fig.S12. Original western blot membrane of protein-to-protein interaction between SP1 and eEF2K based on Co-IP.**

**Fig.13.**


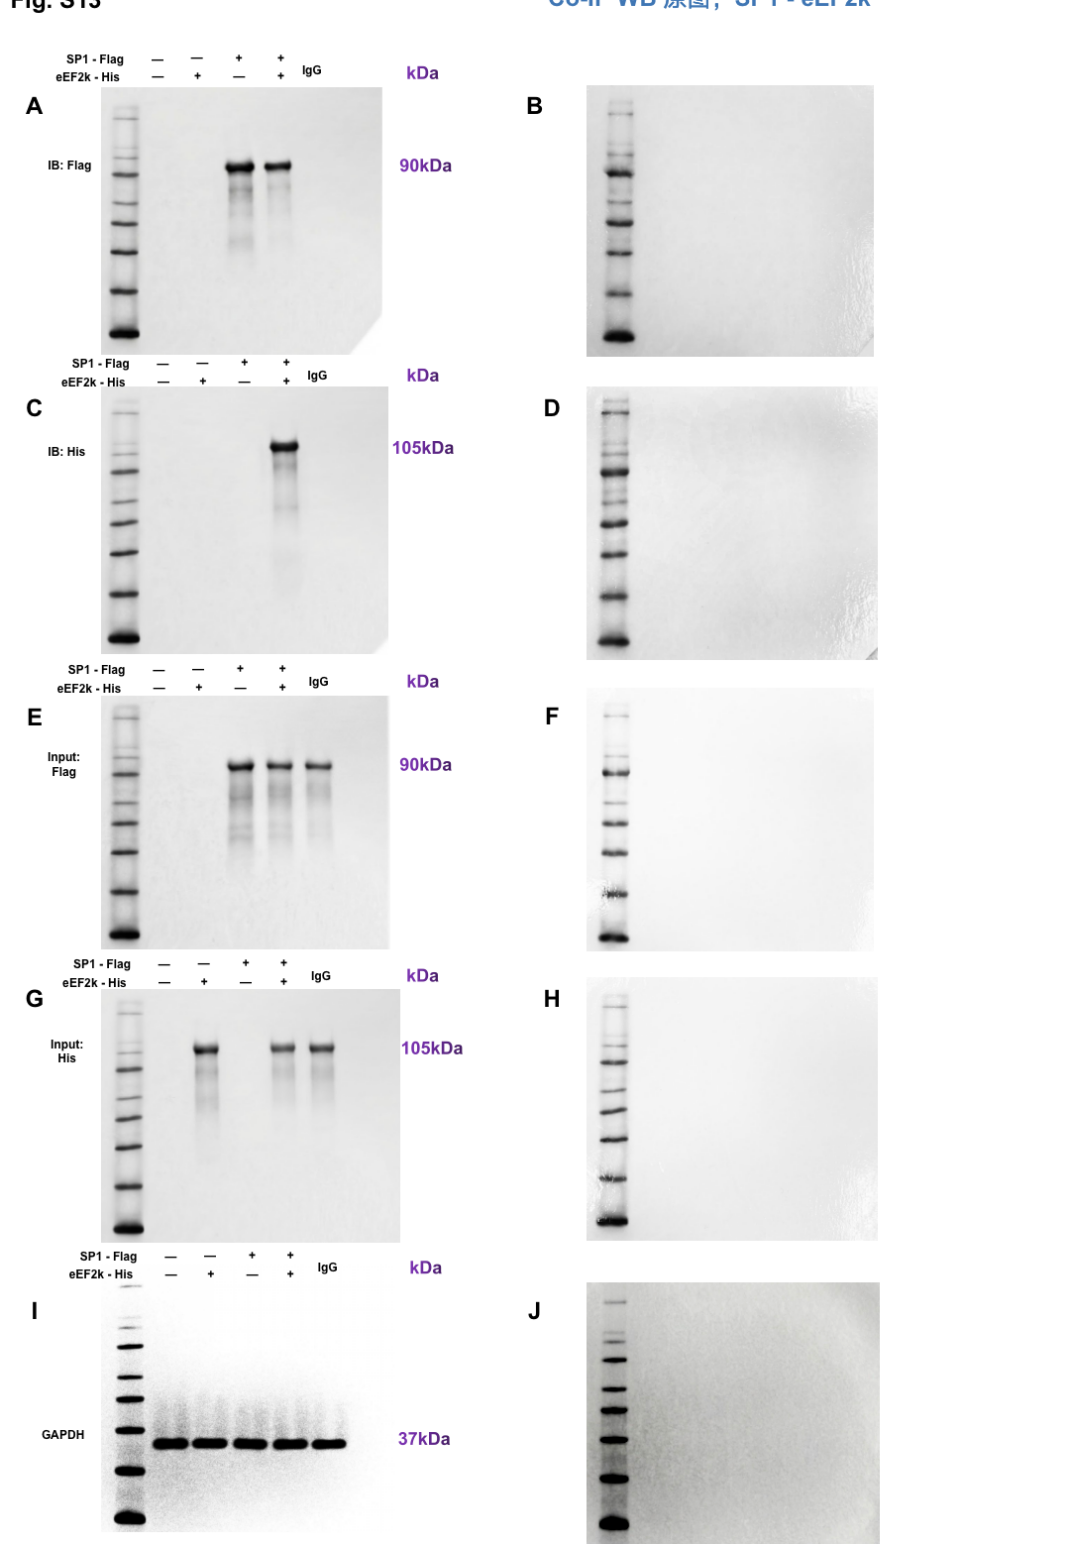


**Fig.S13. Original western blot membrane of protein-to-protein interaction between SP1 and eEF2K based on Co-IP.**

**Fig.S14.**


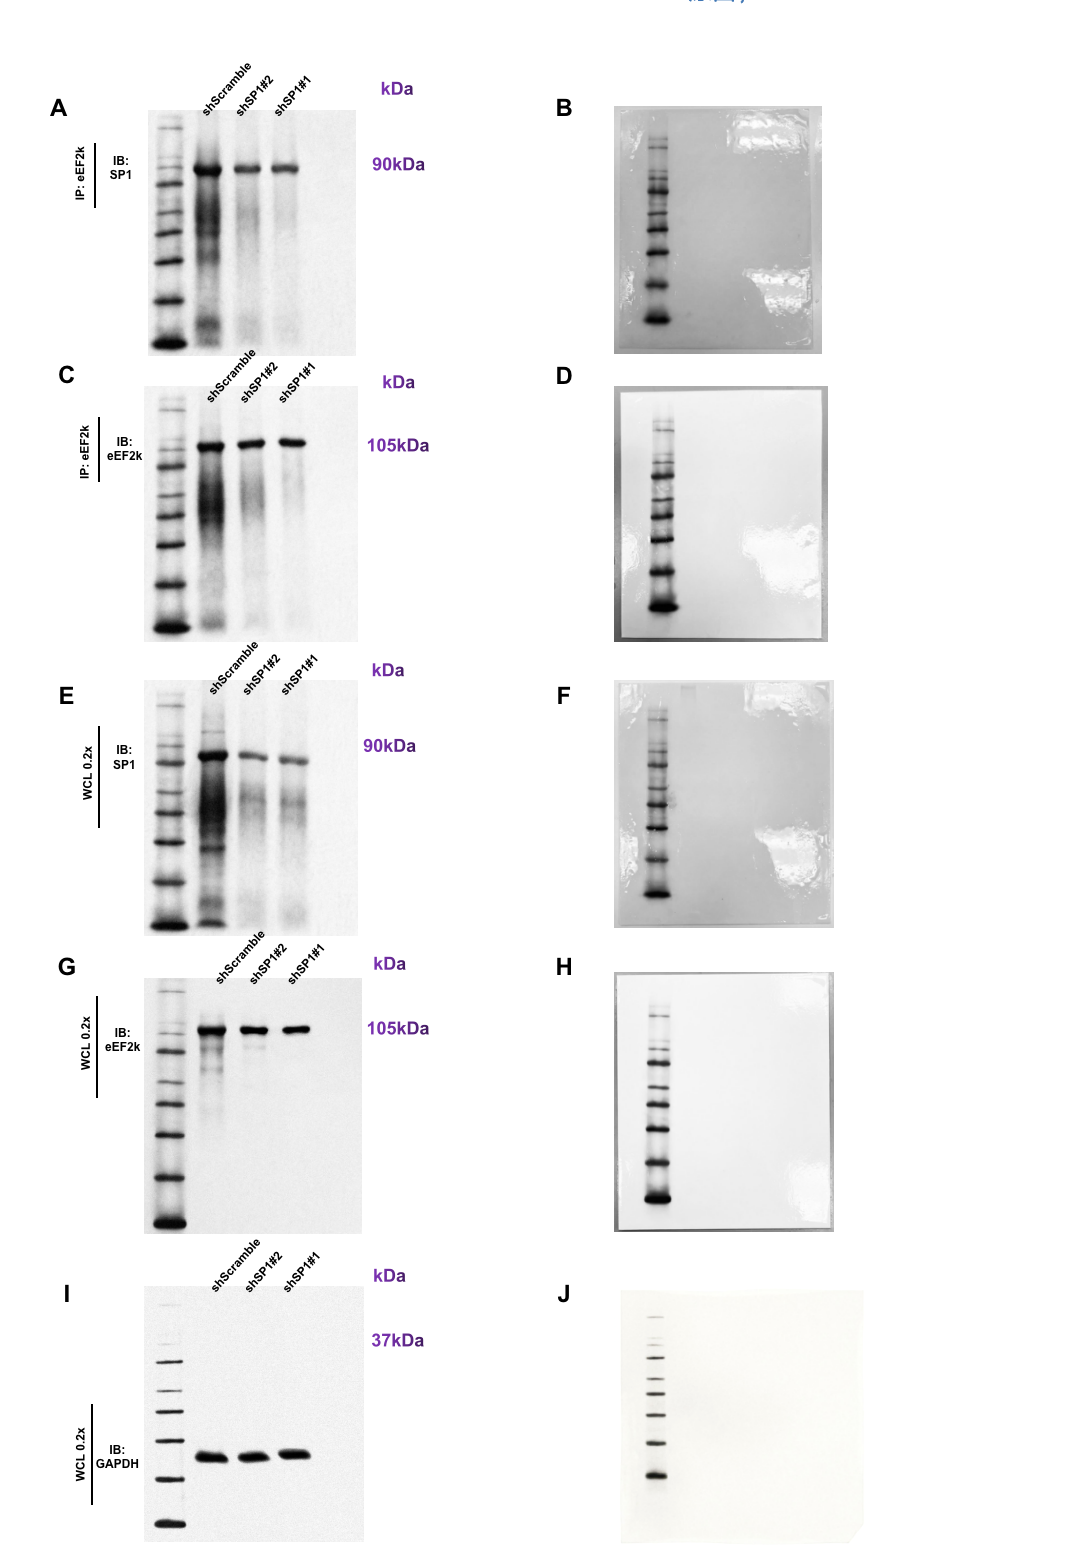


**Fig.S14. Original western blot membrane of protein-to-protein interaction between SP1 and eEF2K based on Co-IP.**

**Fig.15.**

**
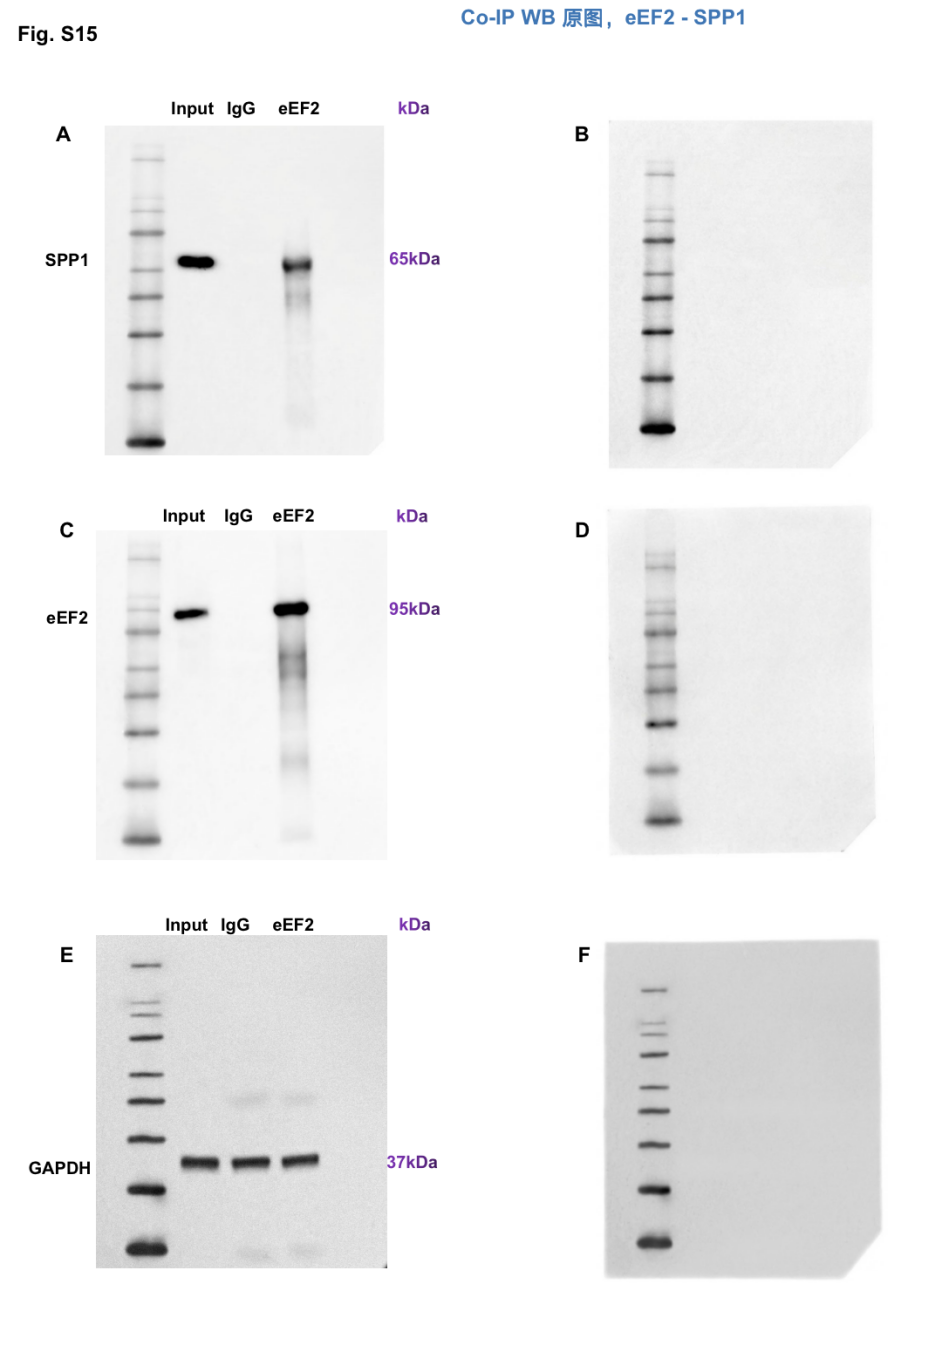
**

**Fig.S15. Original western blot membrane of protein-to-protein interaction between eEF2 and SPP1 based on Co-IP .**

**Fig.S16.**


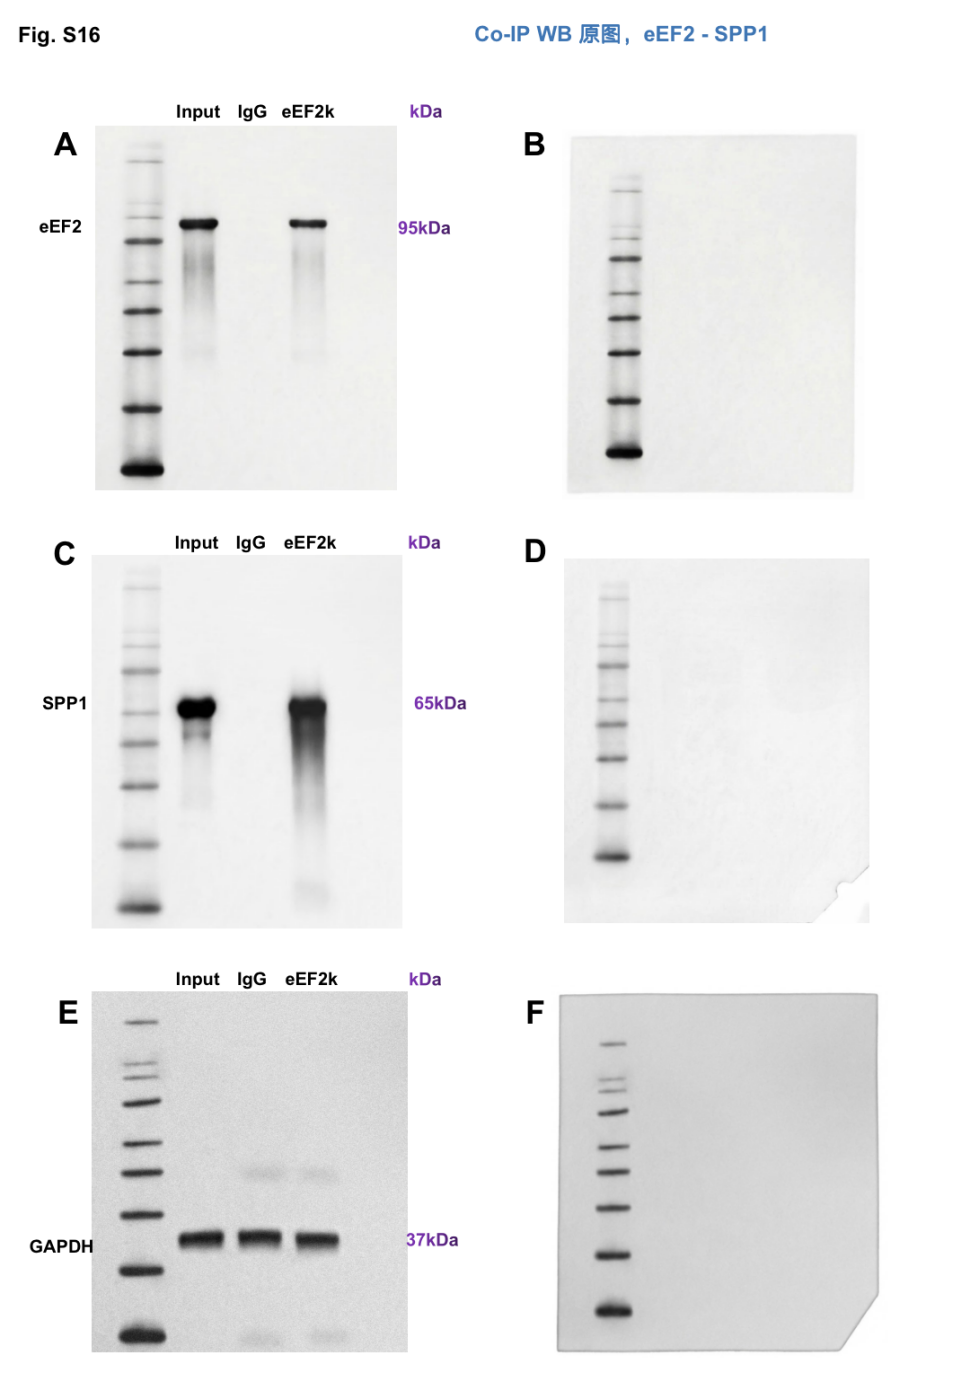


**Fig.S16. Original western blot membrane of protein-to-protein interaction between eEF2 and SPP1 based on Co-IP .**

**Fig.S17.**

**
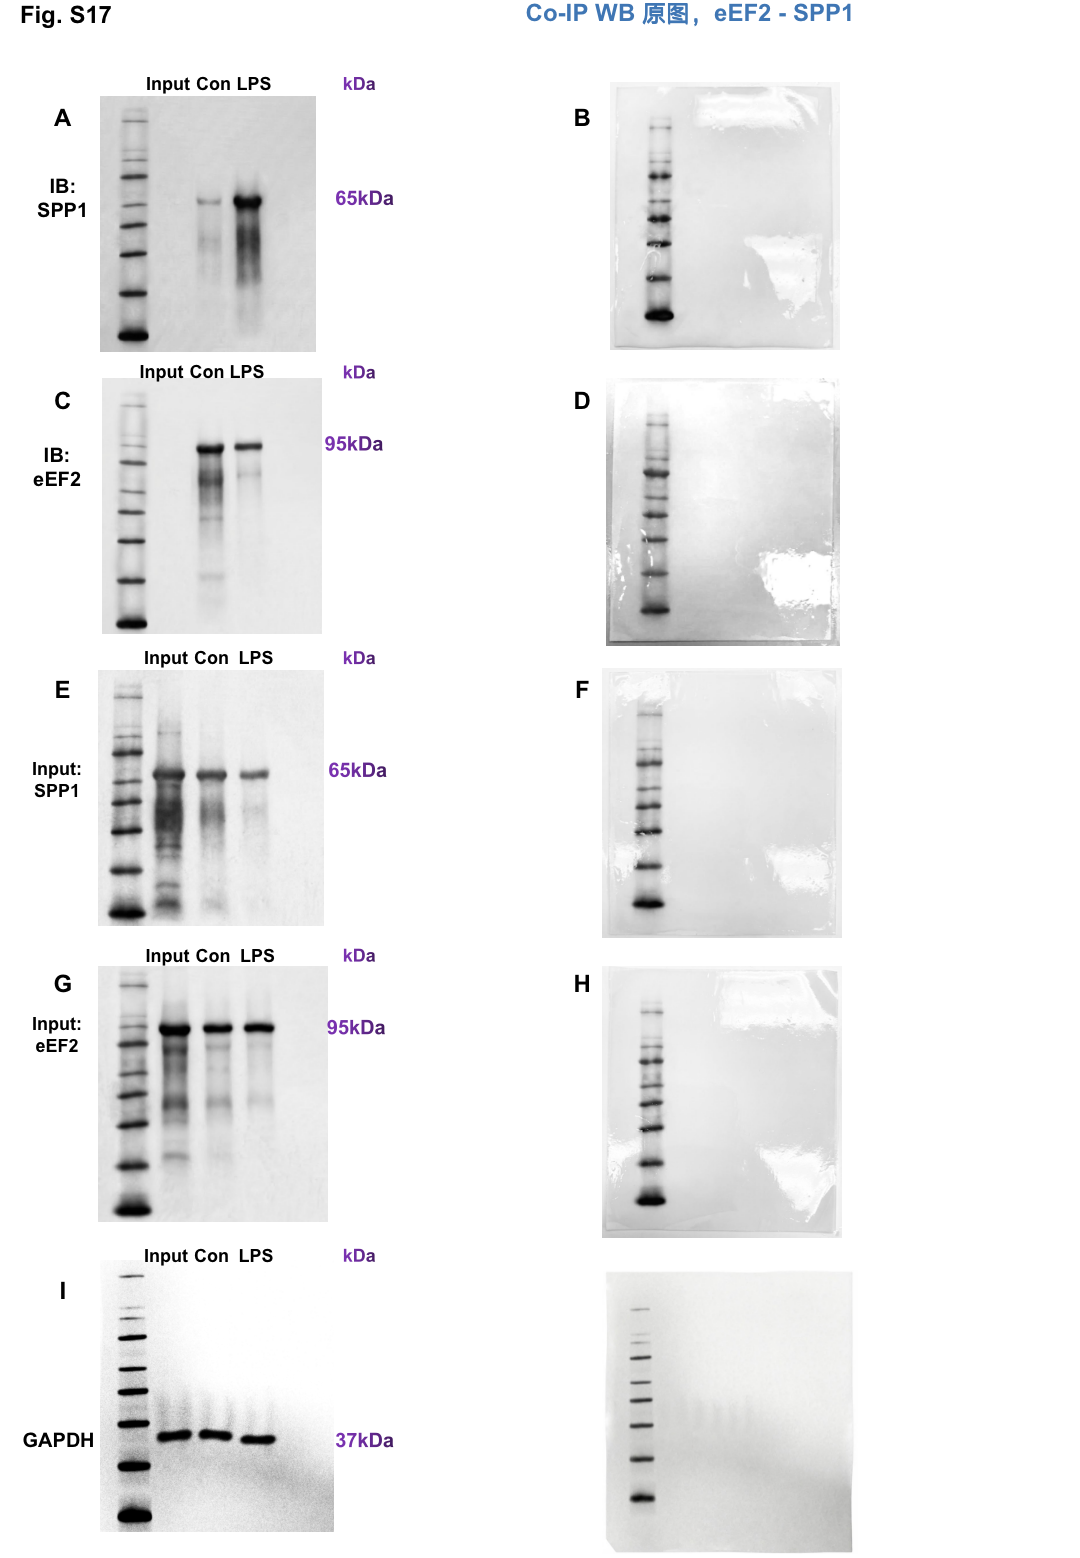
**

**Fig.S17. Original western blot membrane of protein-to-protein interaction between eEF2 and SPP1 based on Co-IP .**

**Fig.S18.**


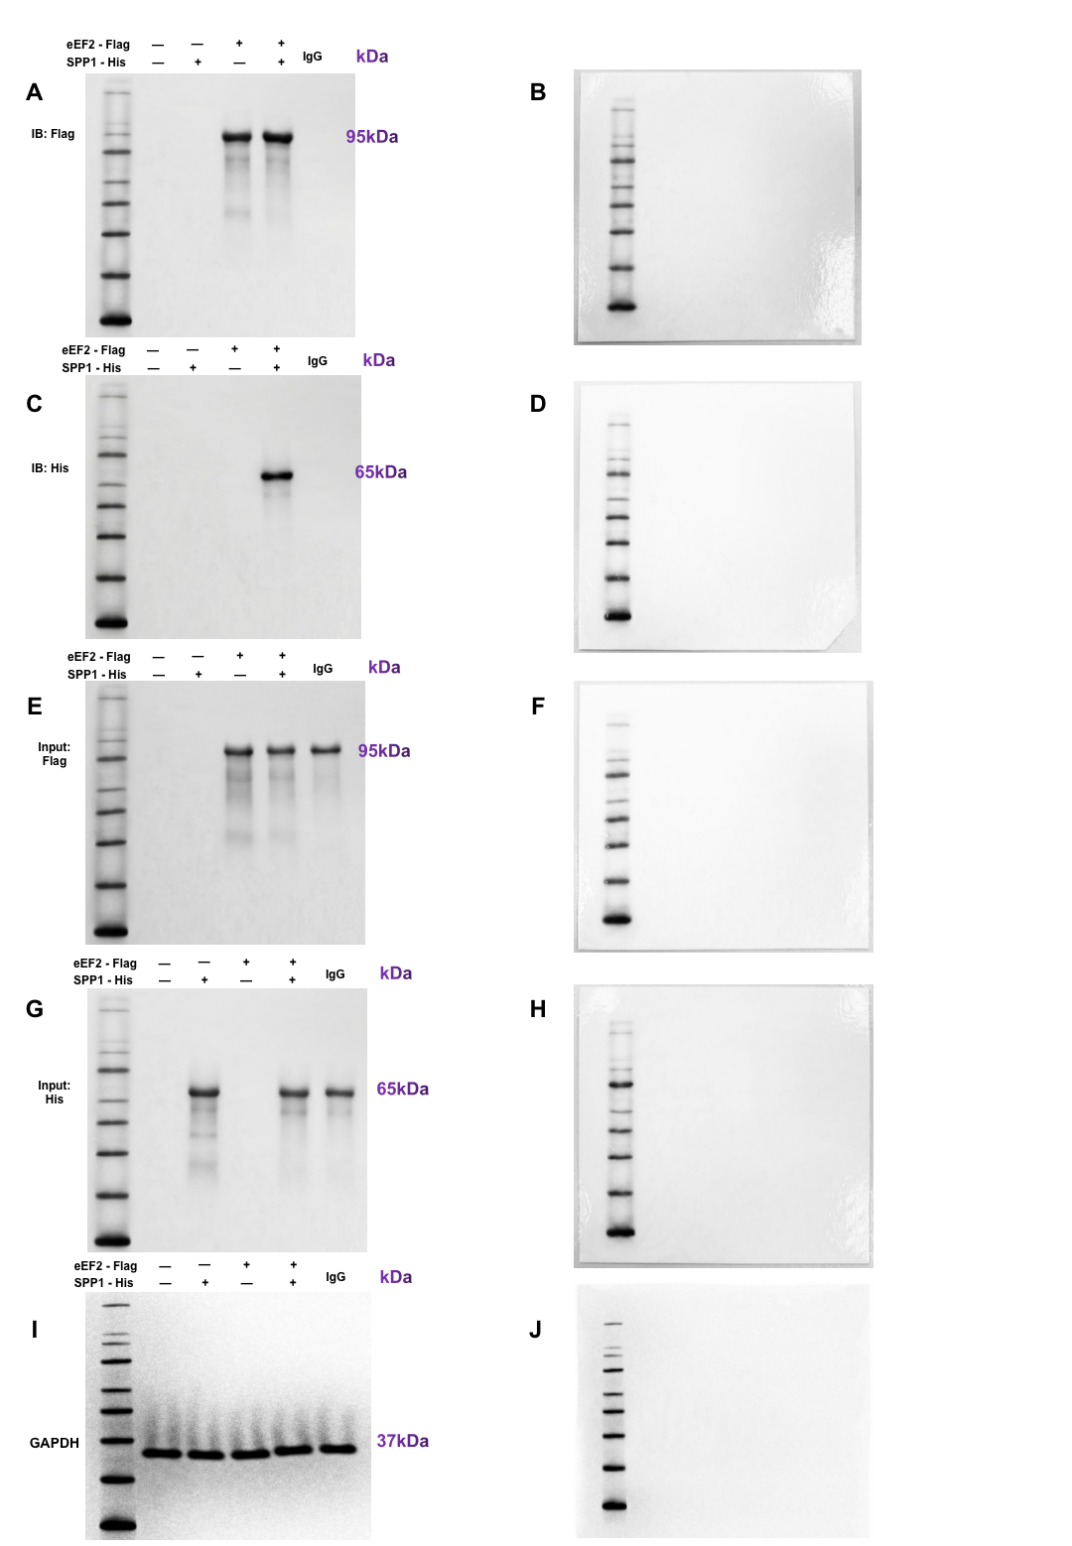


**Fig.S18. Original western blot membrane of protein-to-protein interaction between eEF2 and SPP1 based on Co-IP .**

**Fig.S19.**


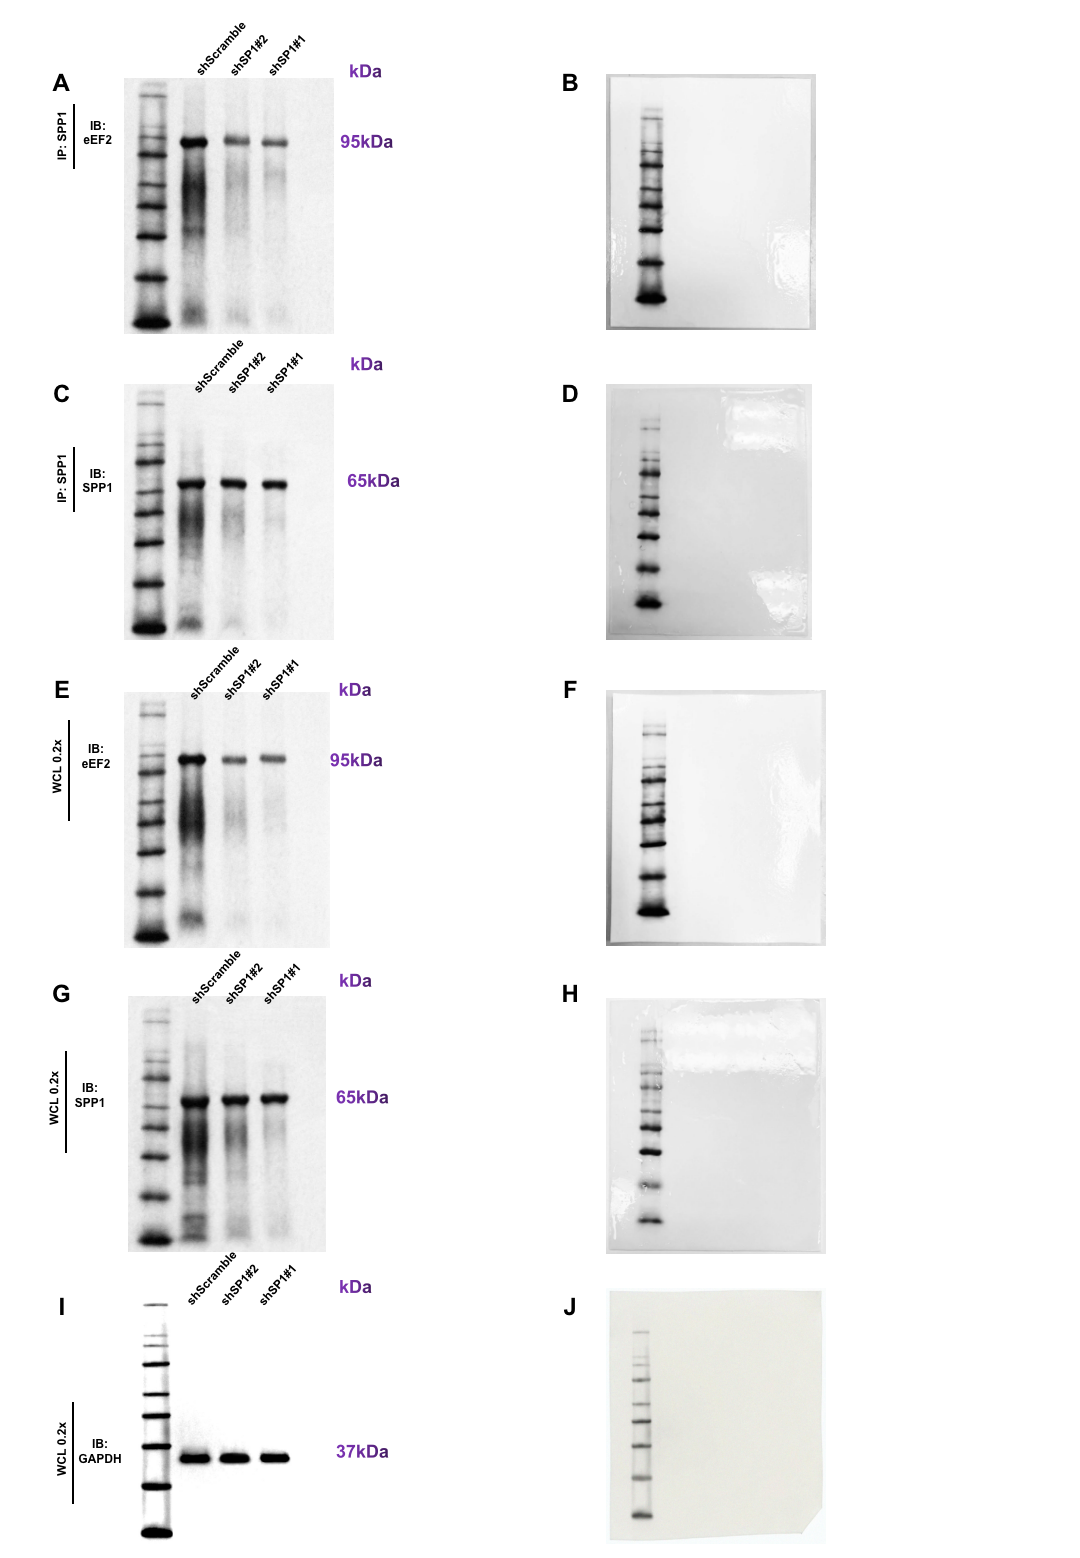


**Fig.S19. Original western blot membrane of protein-to-protein interaction between eEF2 and SPP1 based on Co-IP .**

**Fig.S20.**


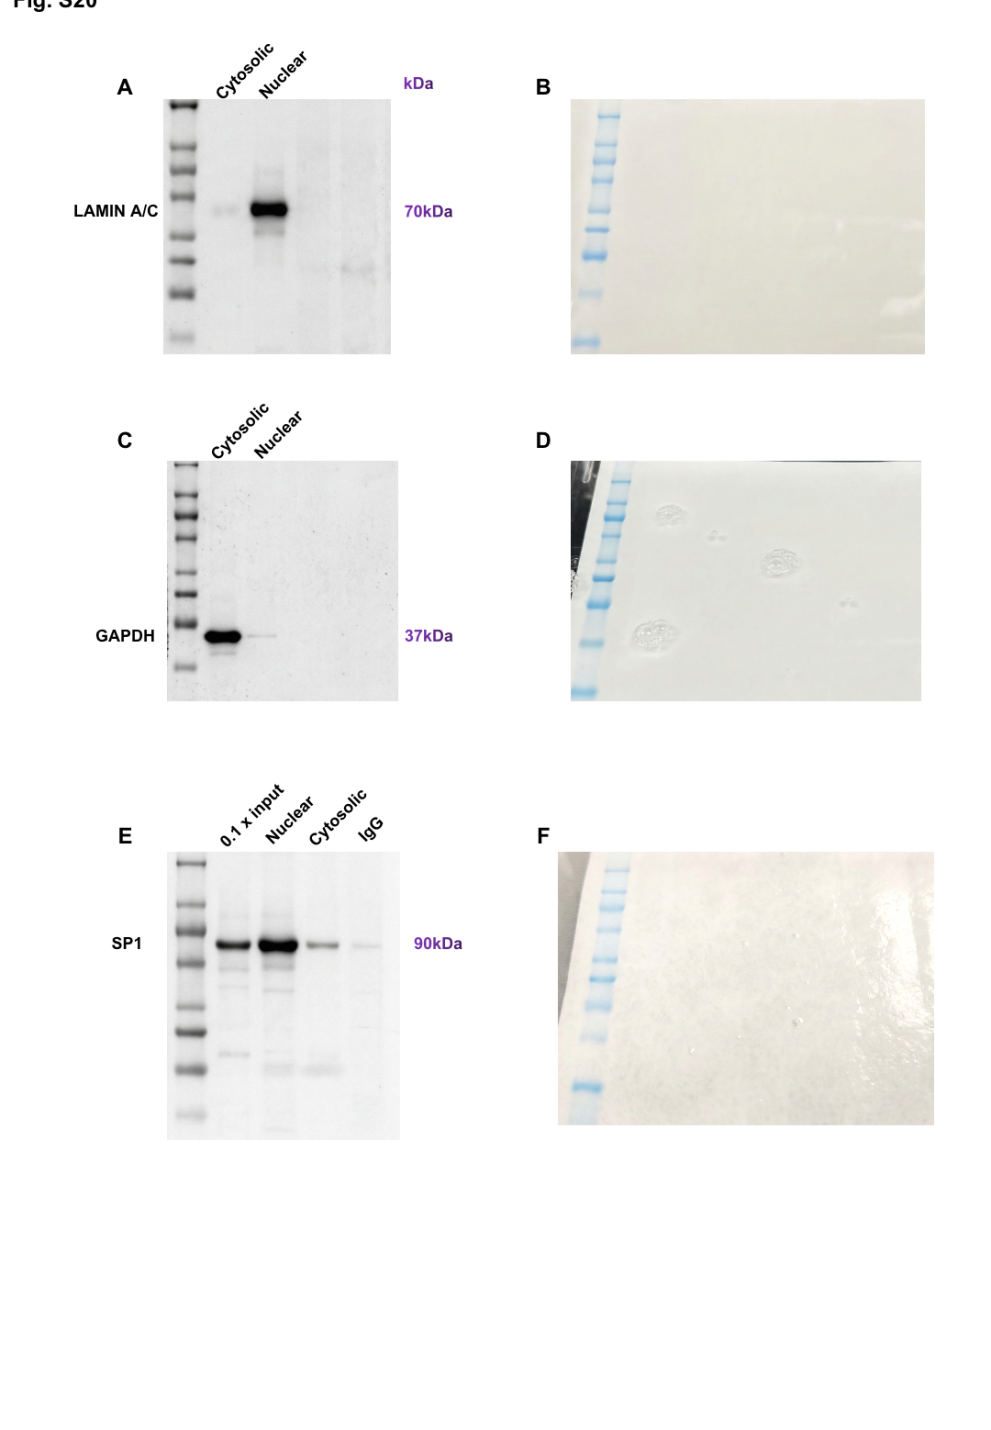


**Fig.S20. Original western blot membrane of the nuclear-cytoplasmic separation of chondrocytes to identify the accurate location of SP1 and eEF2K.**

**Fig.S21.**


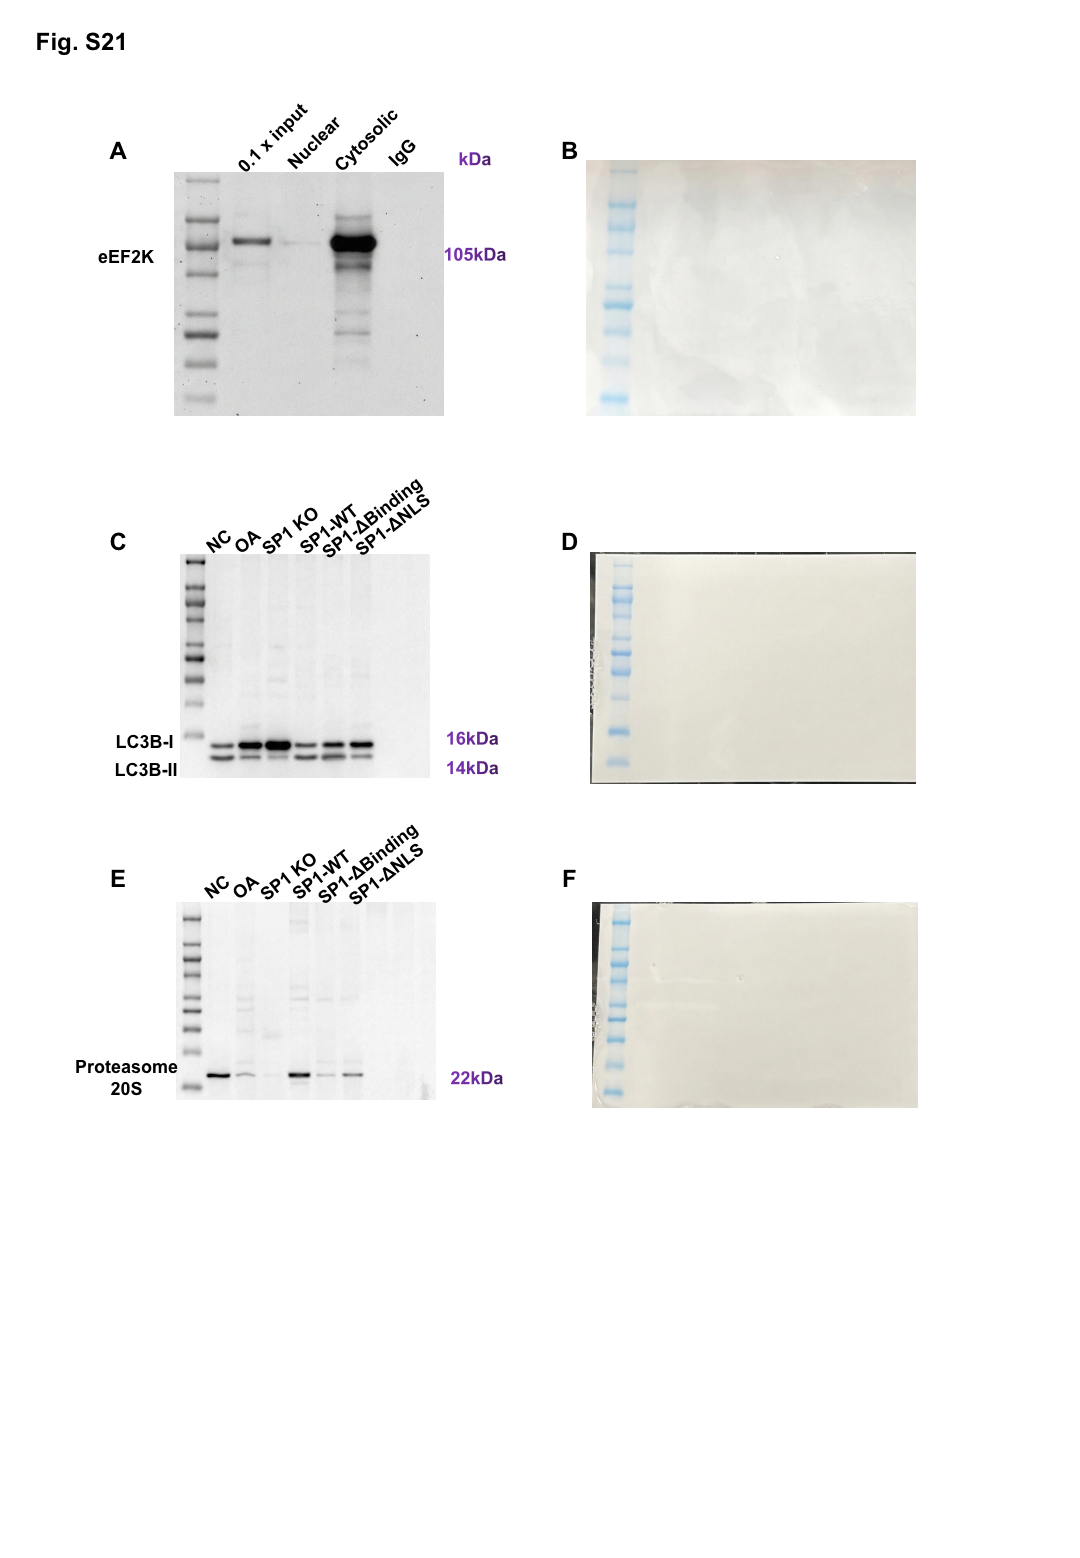


**Fig.S21. Original western blot membrane of the nuclear-cytoplasmic separation of chondrocytes to identify the accurate location of SP1 and eEF2K.**

**Fig.S22.**


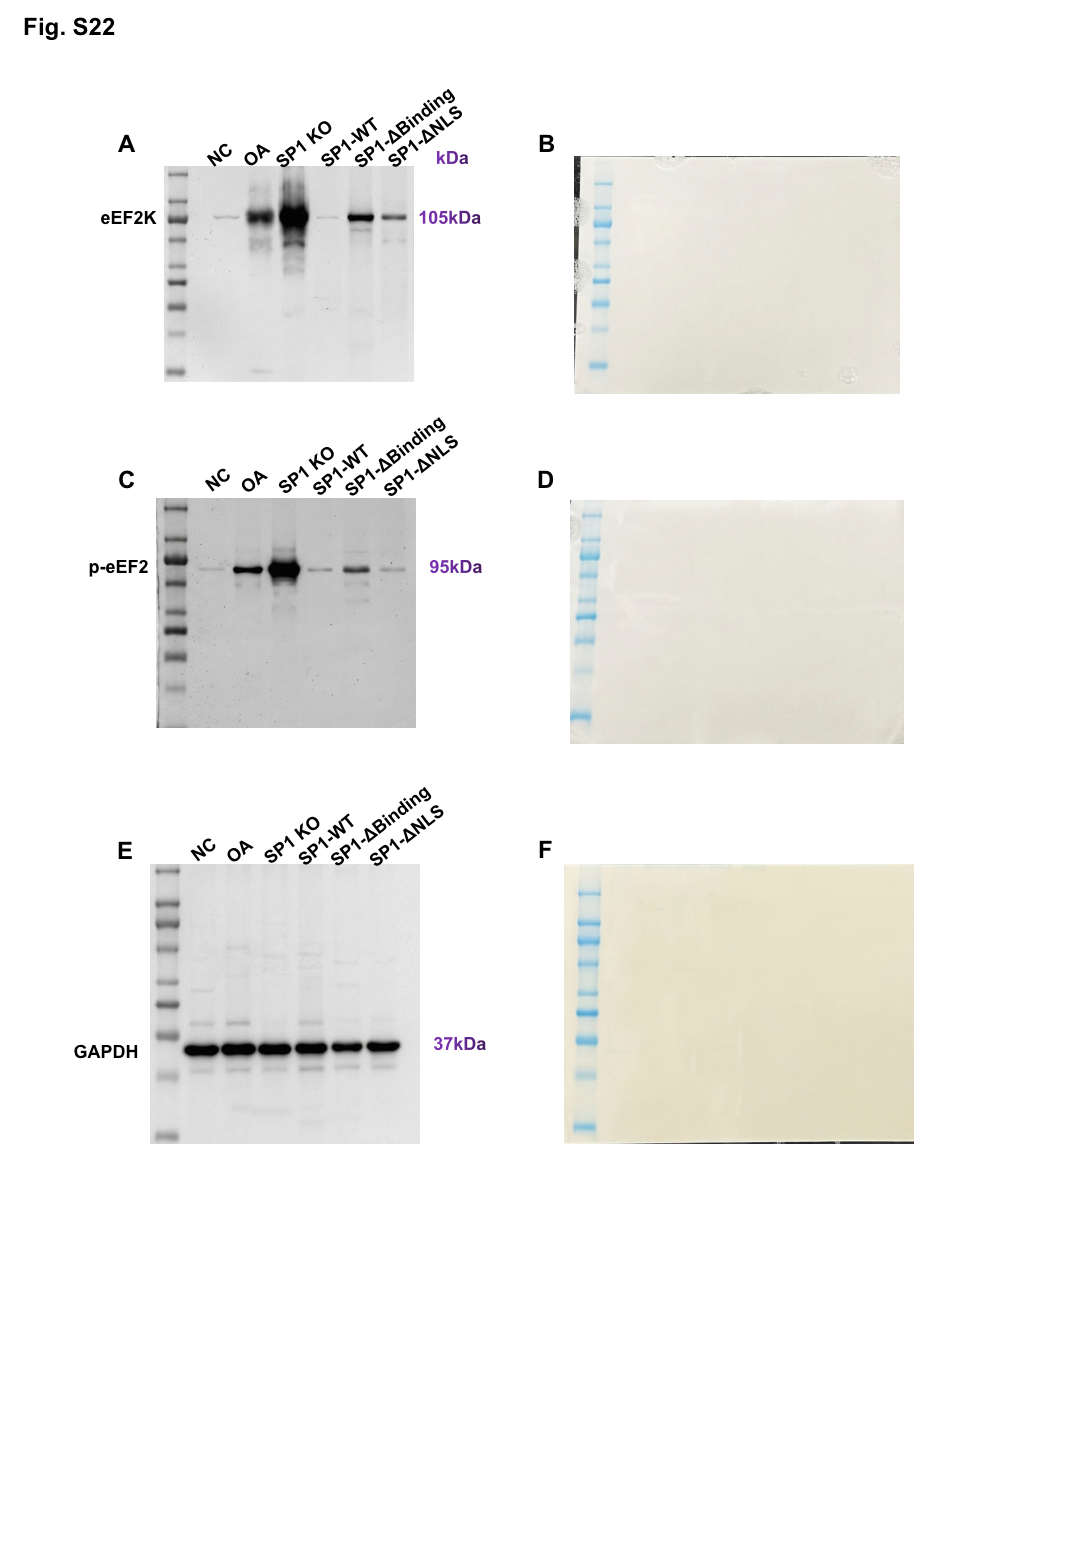


**Fig.S22. Original western blot membrane of the nuclear-cytoplasmic separation of chondrocytes to identify the accurate location of SP1 and eEF2K.**

**Fig.23.**

**
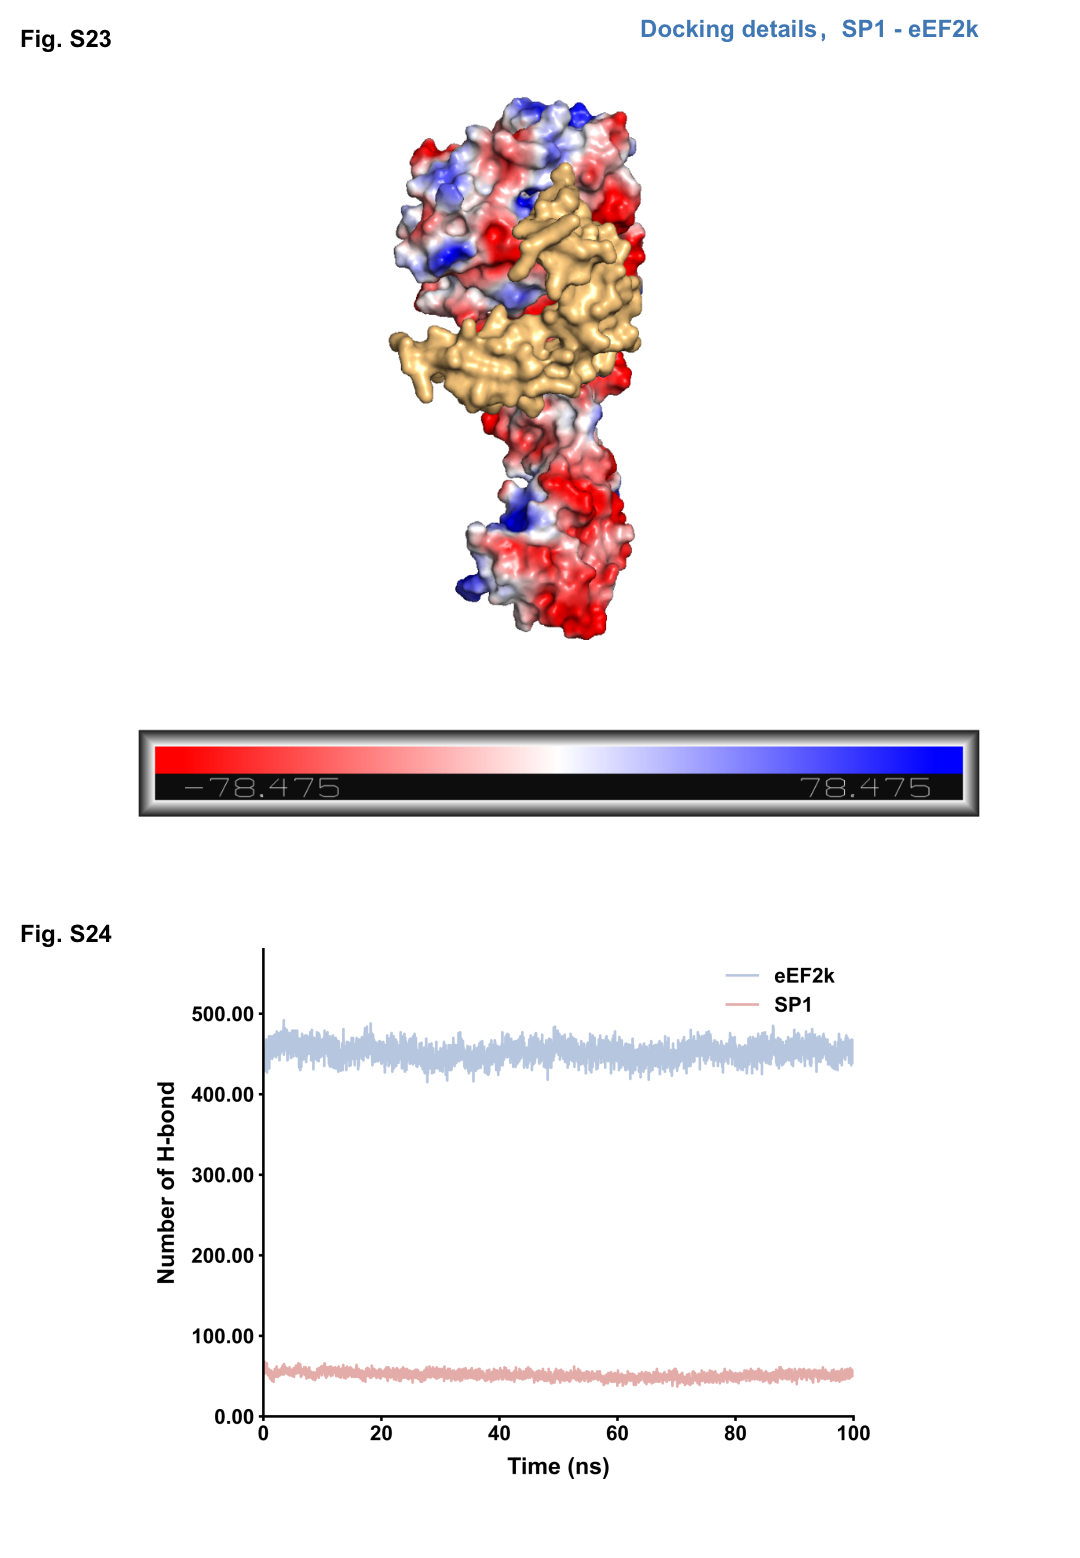
**

**Fig.S23. The 3D structure and surface electrostatic potential distribution of the SP1-eEF2K protein complex. The wheat-colored region represents the SP1 protein, while the red-blue colored region corresponds to the eEF2K protein, with the color mapping indicating the surface electrostatic potential distribution.**

**Fig.S24.**

**
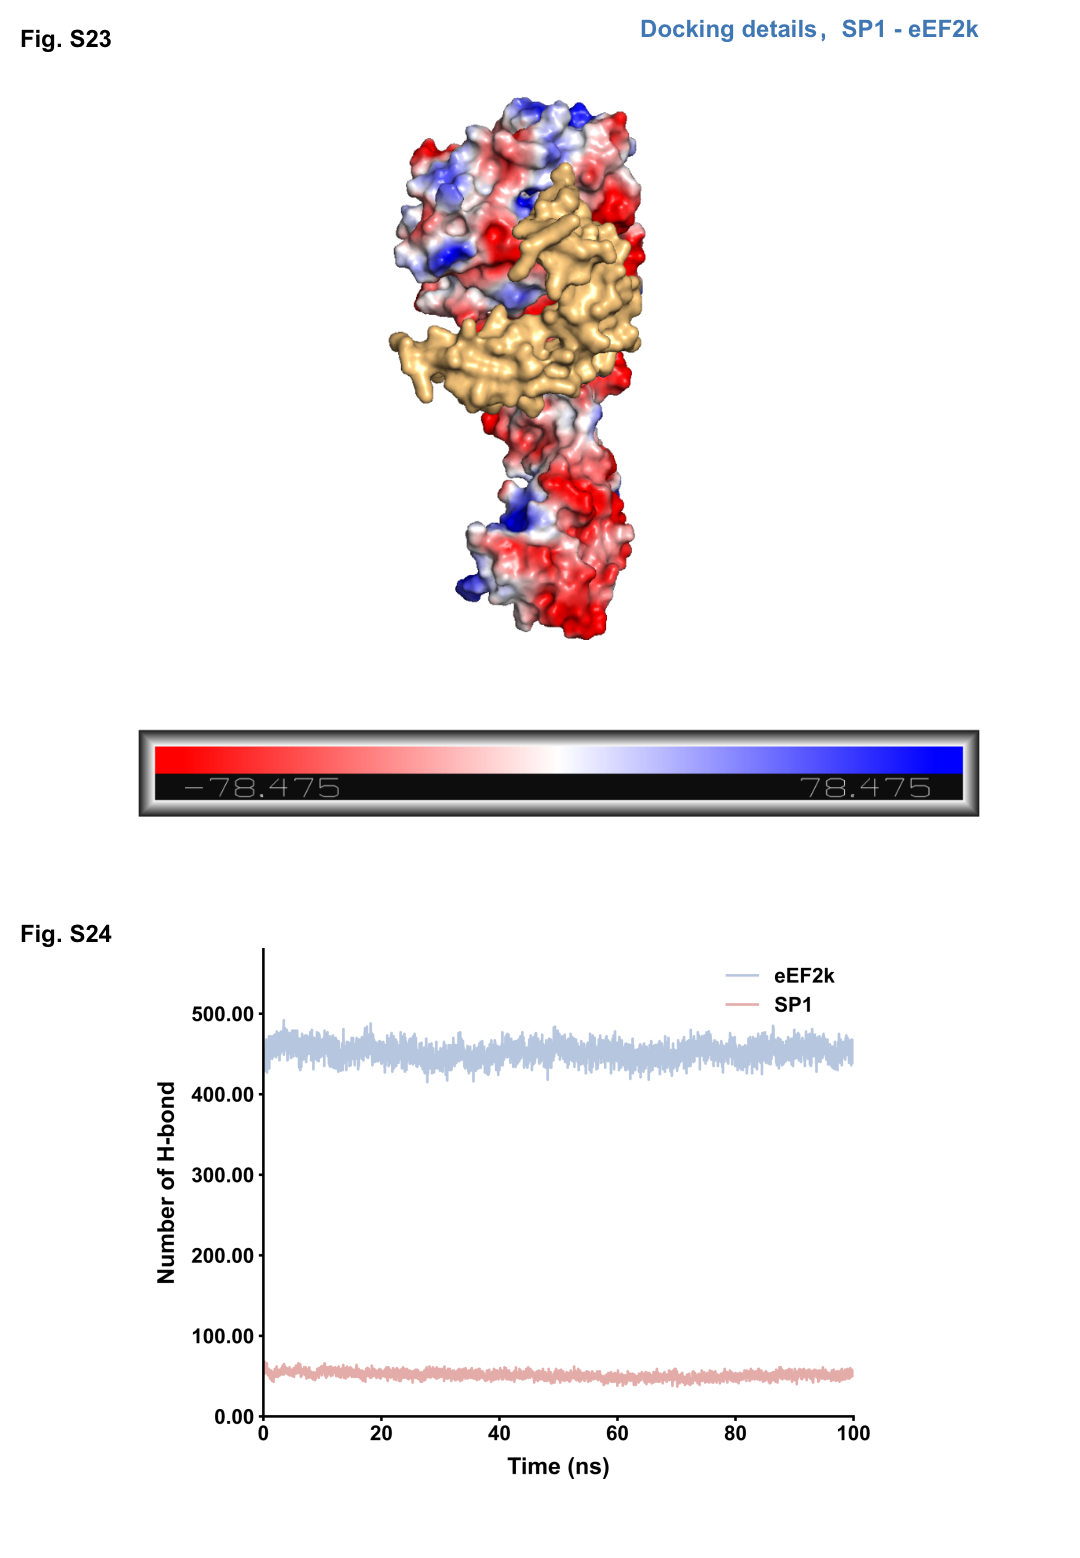
**

**Fig.S24. Intramolecular hydrogen bond dynamics of SP1 and eEF2K during 100 ns molecular dynamics simulation.** The numbers of intramolecular hydrogen bonds within eEF2K and SP1 were quantified during the 100 ns molecular dynamics simulation of the eEF2K–SP1 complex. eEF2K showed an average of 452.5189 ± 10.2536 intramolecular hydrogen bonds, with frequent fluctuations over time. SP1 showed an average of 51.3729 ± 4.1665 intramolecular hydrogen bonds and comparatively smaller temporal fluctuations.

**Fig.25.**

**
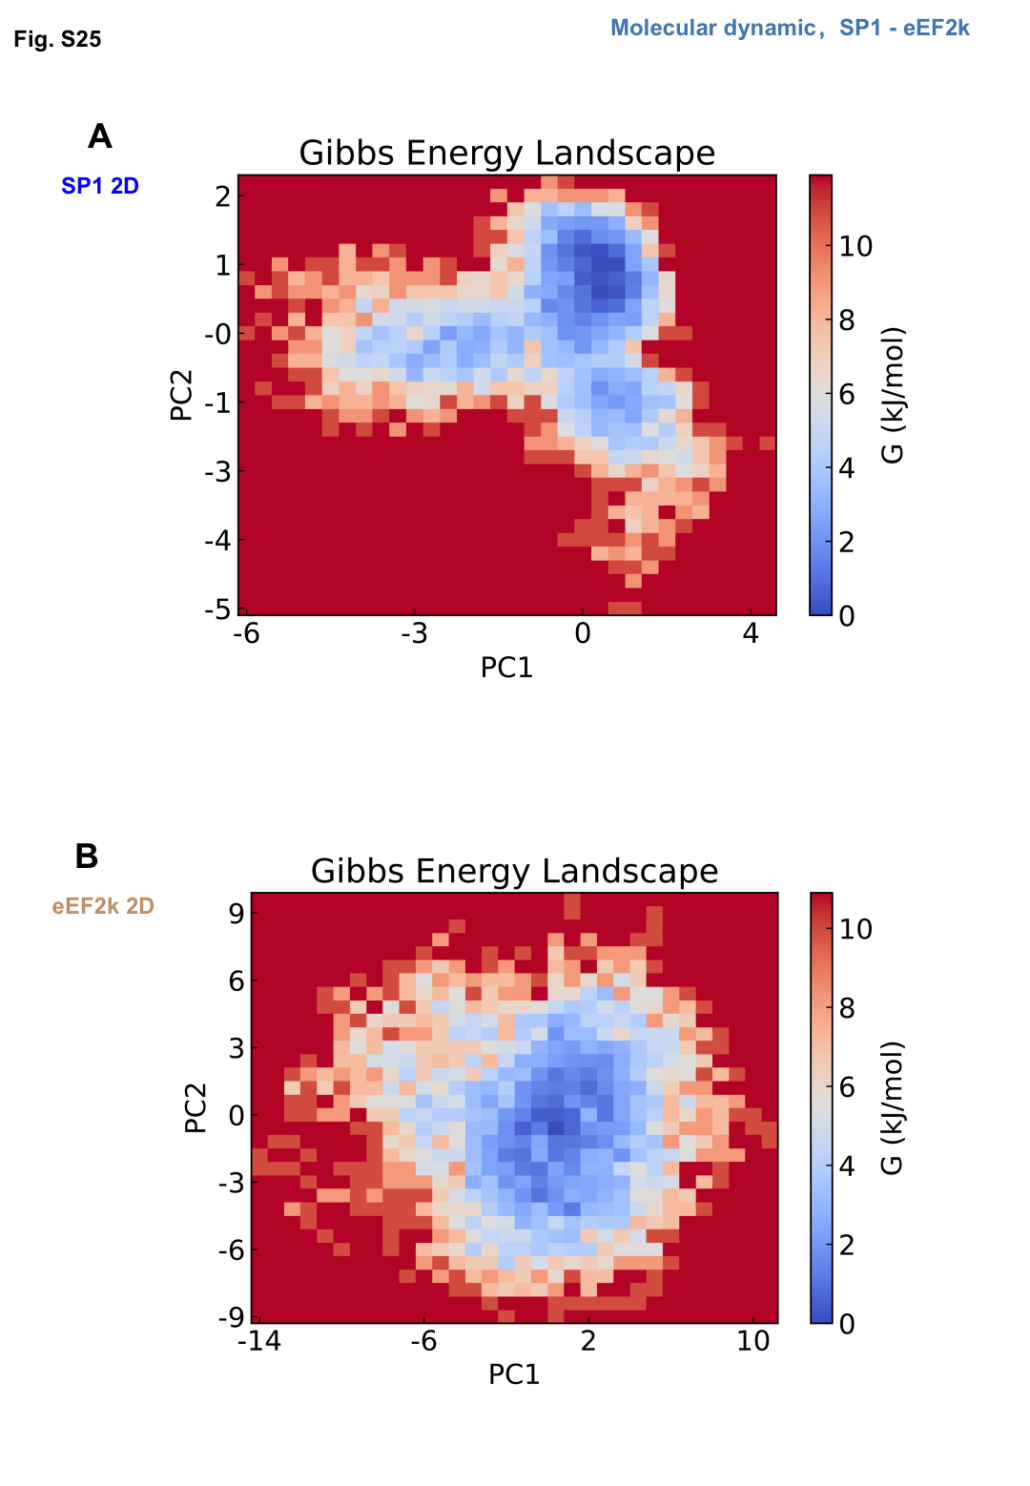
**

**Fig.S25. The 2D structure and surface electrostatic potential distribution of the eEF2-p-eEF2 protein complex.** (**A**) SP1 displayed multiple dispersed low-energy basins across a broad conformational space, consistent with conformational heterogeneity and high structural flexibility. (**B**) eEF2K exhibited a single dominant deep energy basin, with higher-energy states confined to the periphery of the landscape, indicating relatively stable global conformational dynamics with defined energetic barriers to conformational transition.

**Fig.S26.**


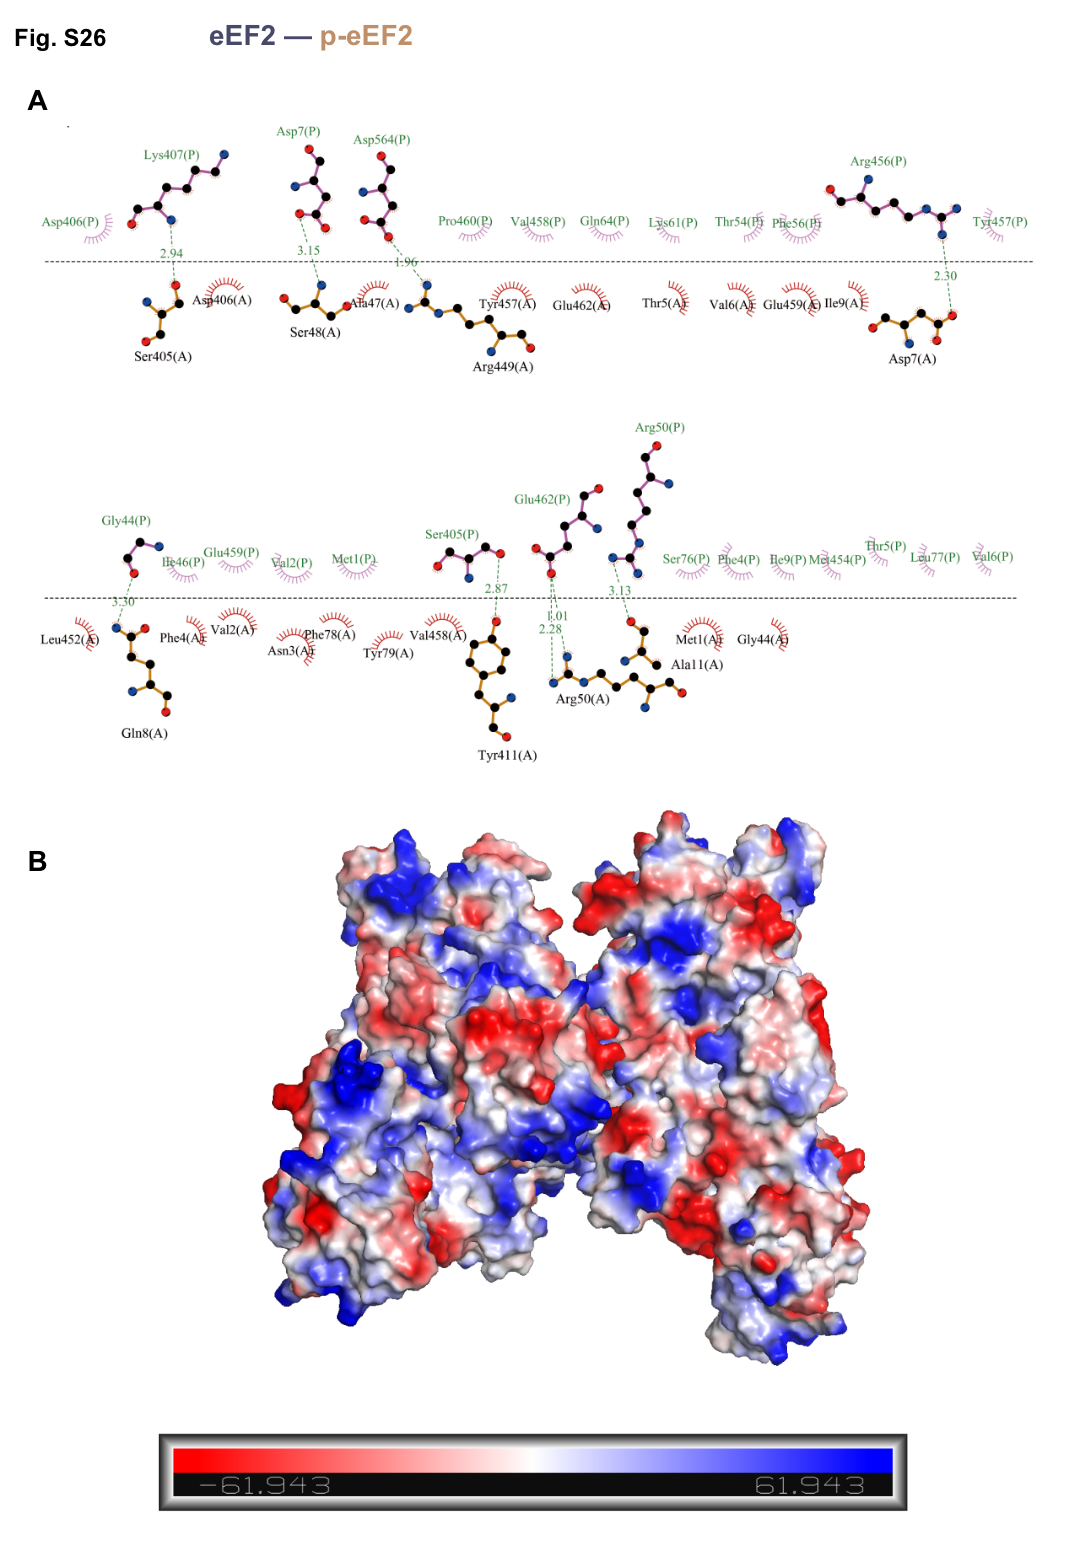


**Fig.S26. 2D and 3D interaction map of the eEF2-p-eEF2 protein complex.** (**A**) 2D interaction map of the eEF2-p-eEF2 complex. The dashed line indicates the protein-to-protein interface. Residues above and below the interface correspond to eEF2 and p-eEF2, respectively. (**B**) The 3D structure and surface electrostatic potential distribution of the eEF2-p-eEF2 protein complex.

**Fig.S27.**

**
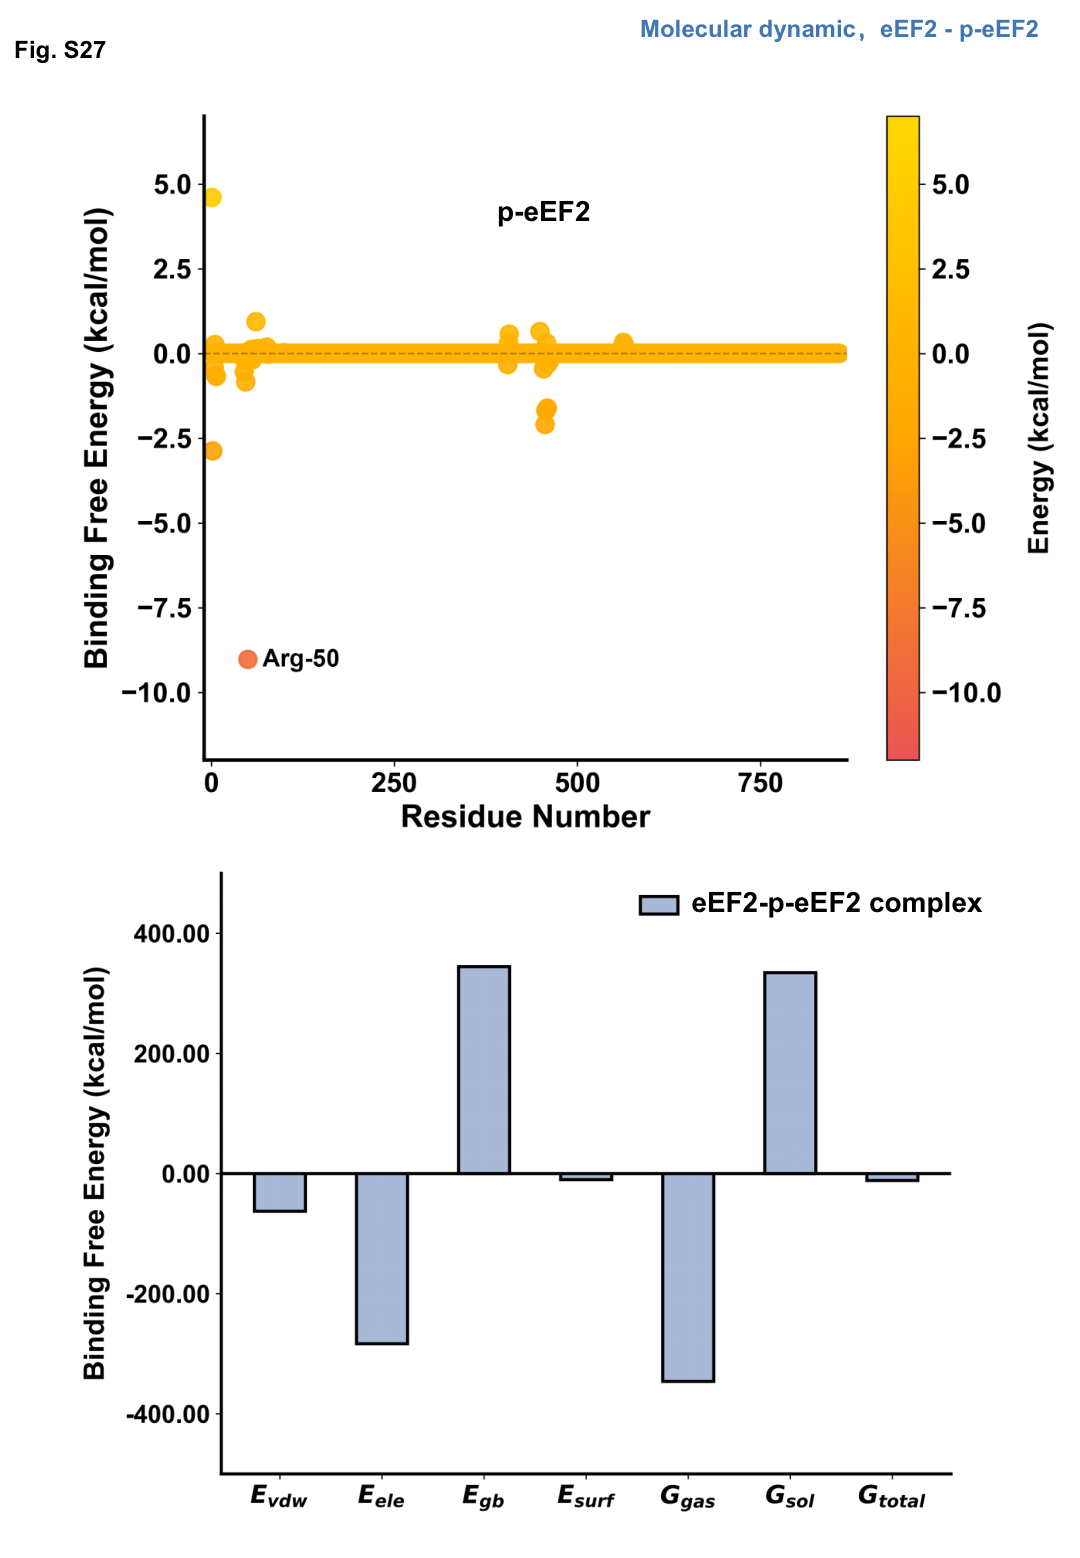
**

**Fig.27. Decomposition of residue-wise binding free energy contributions.**

**Fig.28.**

**
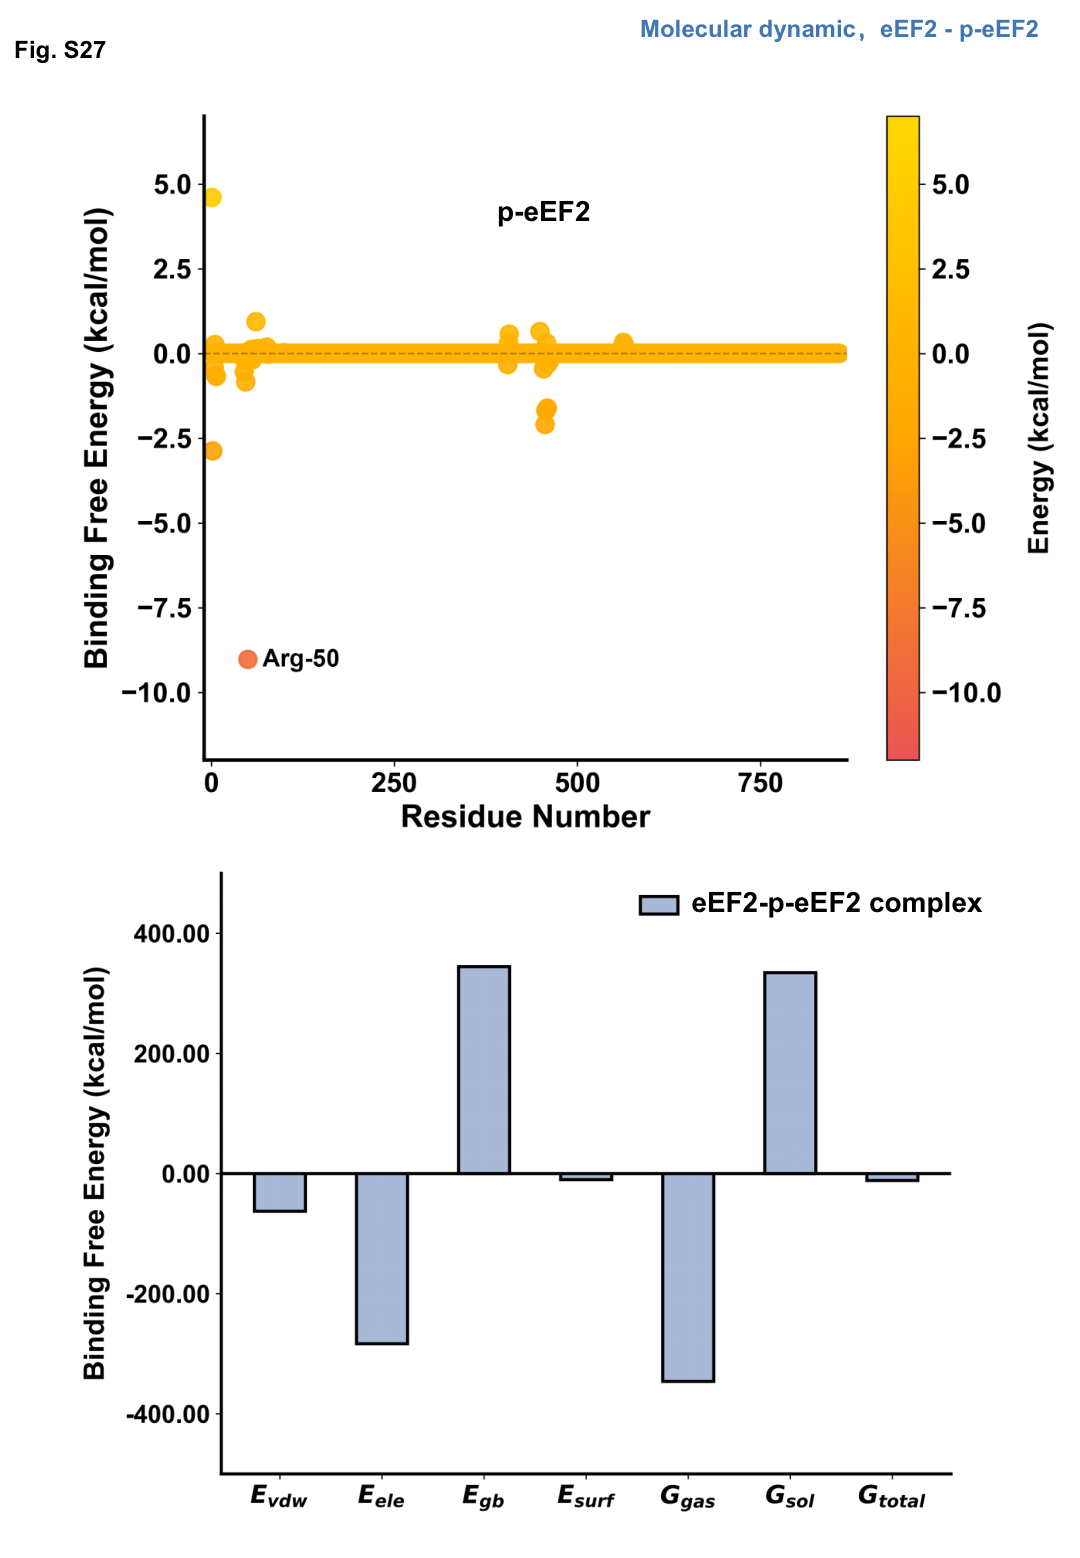
**

**Fig.S28. Binding free-energy decomposition of the eEF2-p-eEF2 complex by MM/GBSA.**

Bar plot showing the residue-wise decomposition of binding free energy in the eEF2-p-eEF2 complex that calculated by MM/GBSA.

**Fig.S29.**

**
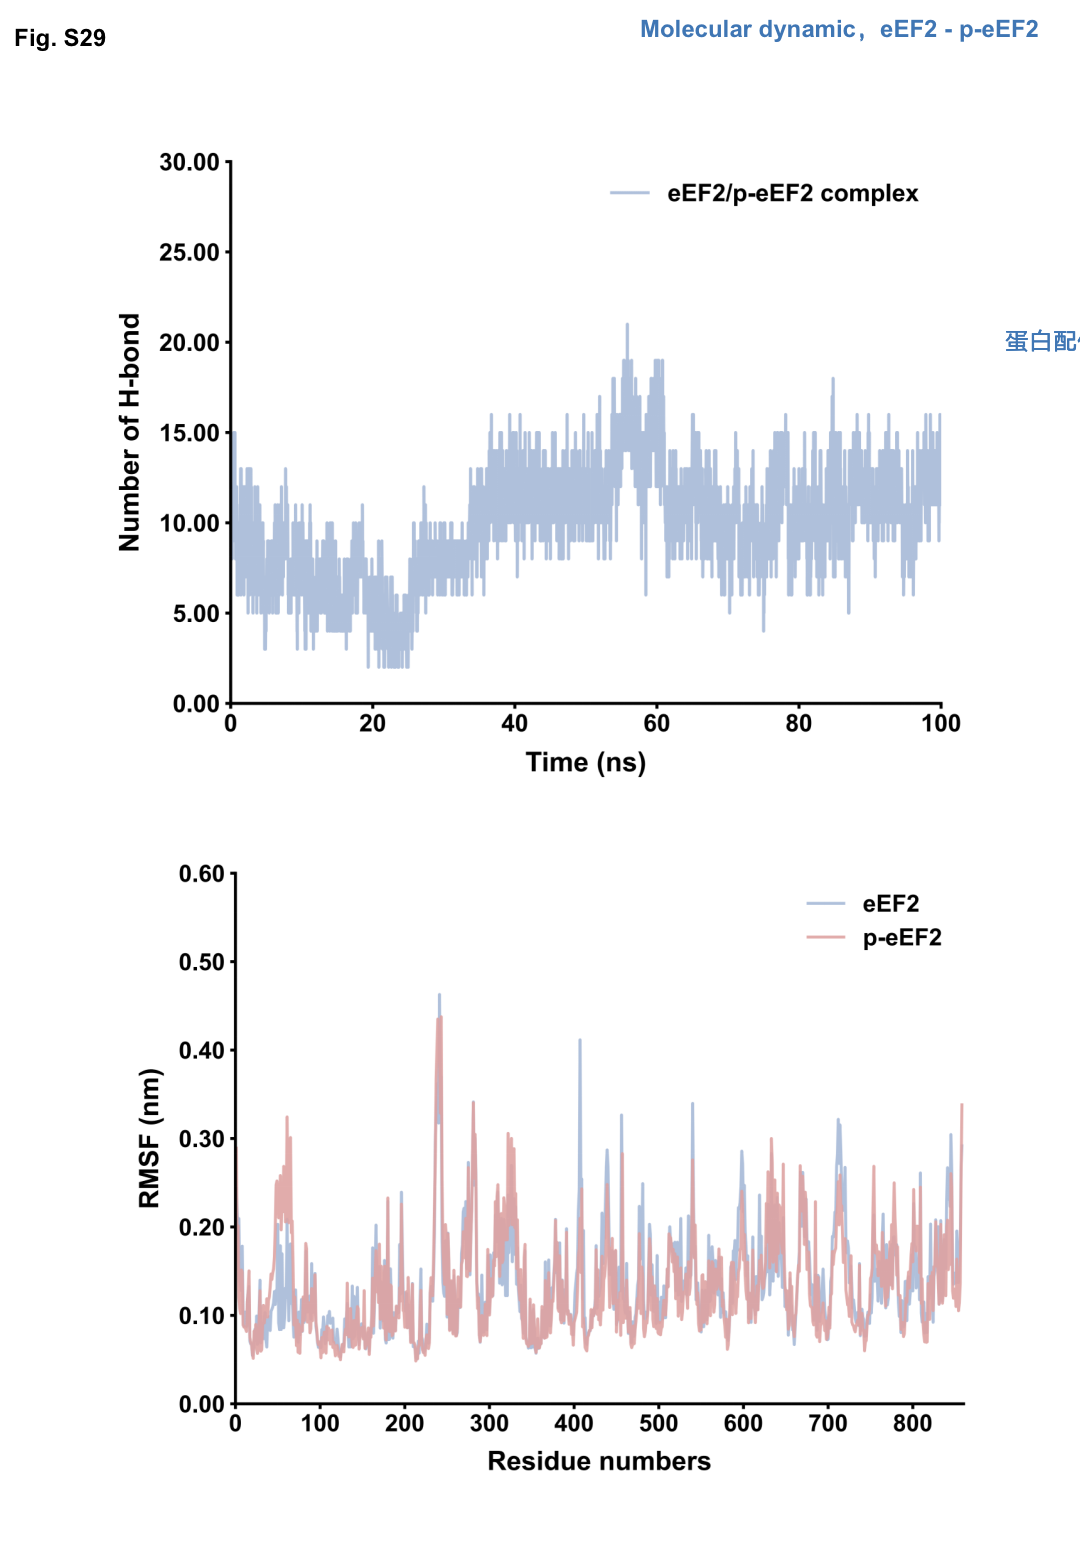
**

**Fig.S29. Intermolecular hydrogen bonds in the eEF2-p-eEF2 complex during 100 ns molecular dynamics simulation.**

Plot showing the time-dependent changes in the number of hydrogen bonds formed between eEF2 and p-eEF2.

**Fig.S30.**

**
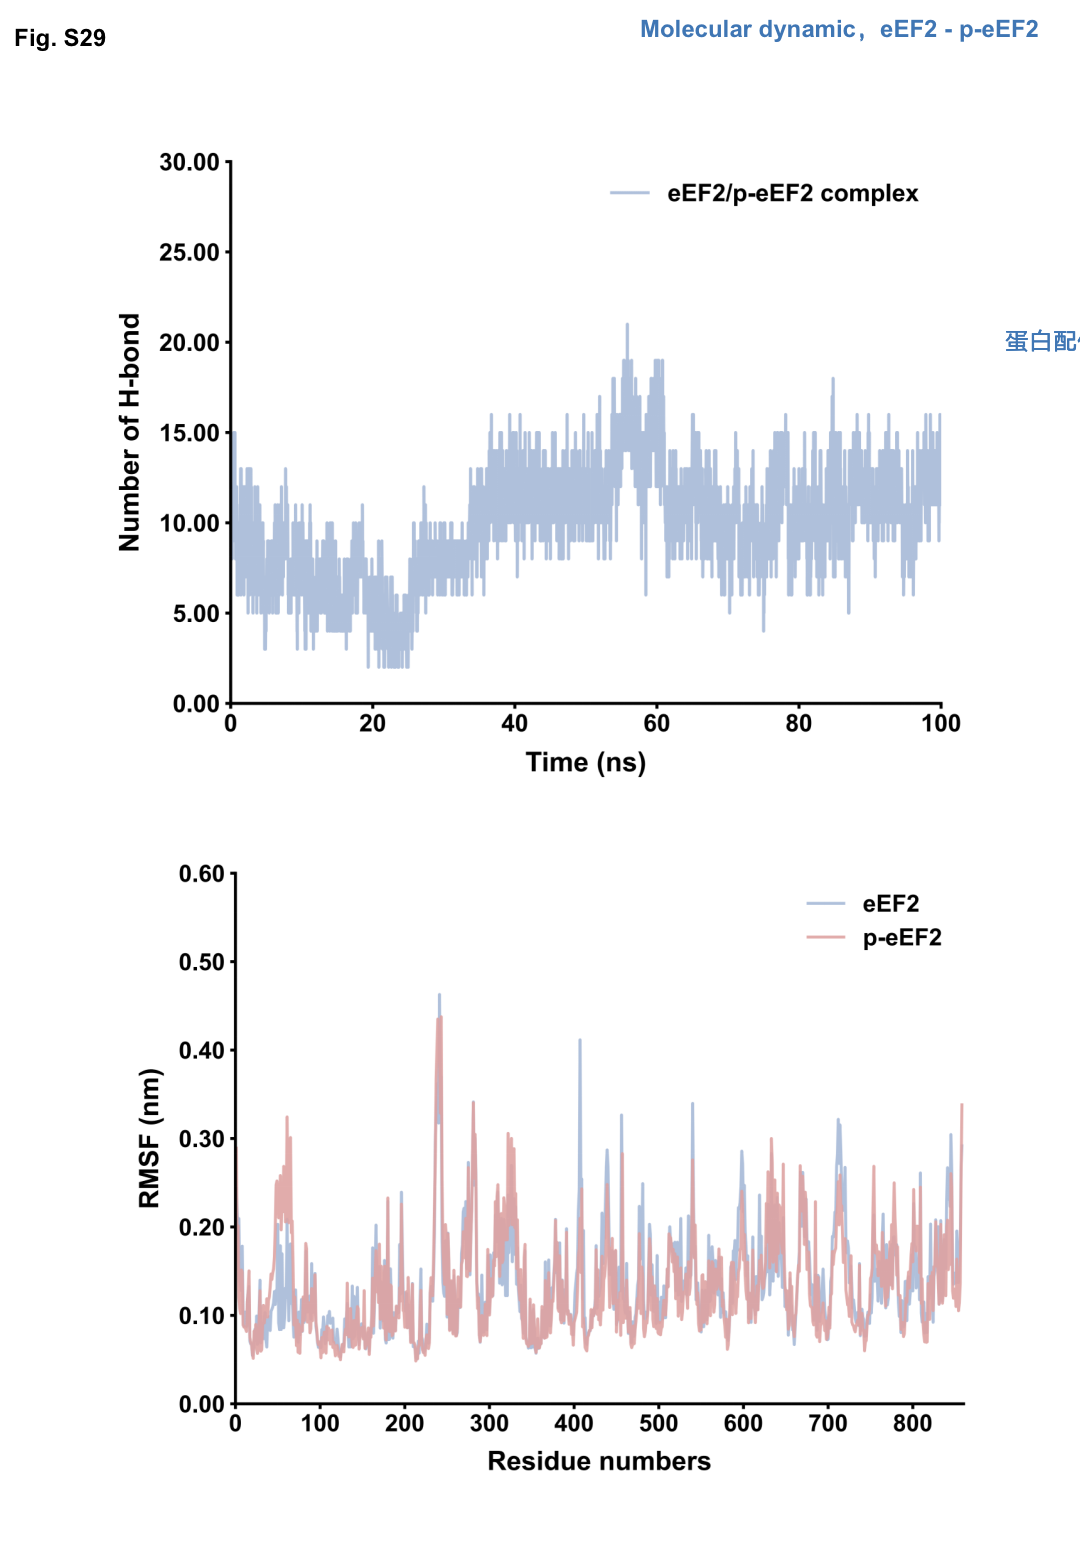
**

**Fig.S30. Residue-wise RMSF profiles of eEF2 and p-eEF2 during 100 ns molecular dynamics simulation.**

Plot showing differences in residue-level flexibility between eEF2 and p-eEF2.

**Fig.S31.**

**
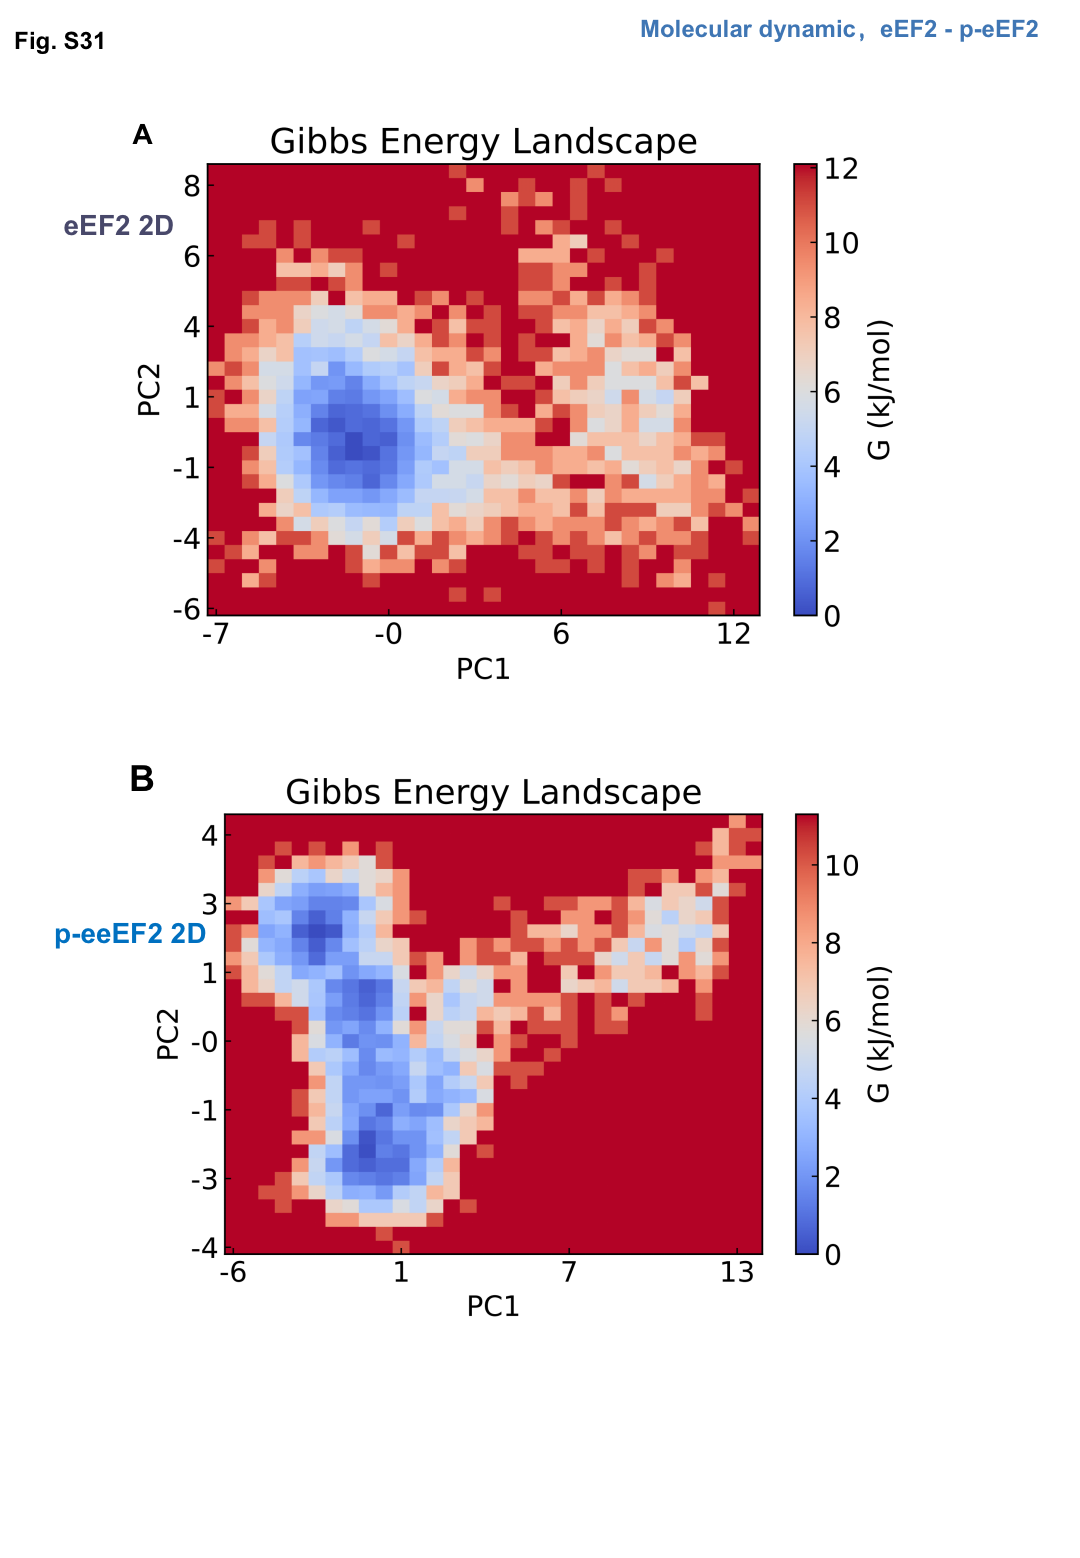
**

**Fig.S31. 2D free-energy landscapes of eEF2 and p-eEF2.** (**A**) eEF2 showed a single dominant low-energy basin, consistent with a globally stable conformational state and relatively high structural rigidity. (**B**) p-eEF2 exhibited multiple dispersed low-energy basins, indicating a multistate conformational landscape with increased flexibility and enhanced dynamic transition among metastable states after phosphorylation.

**Fig.S32.**


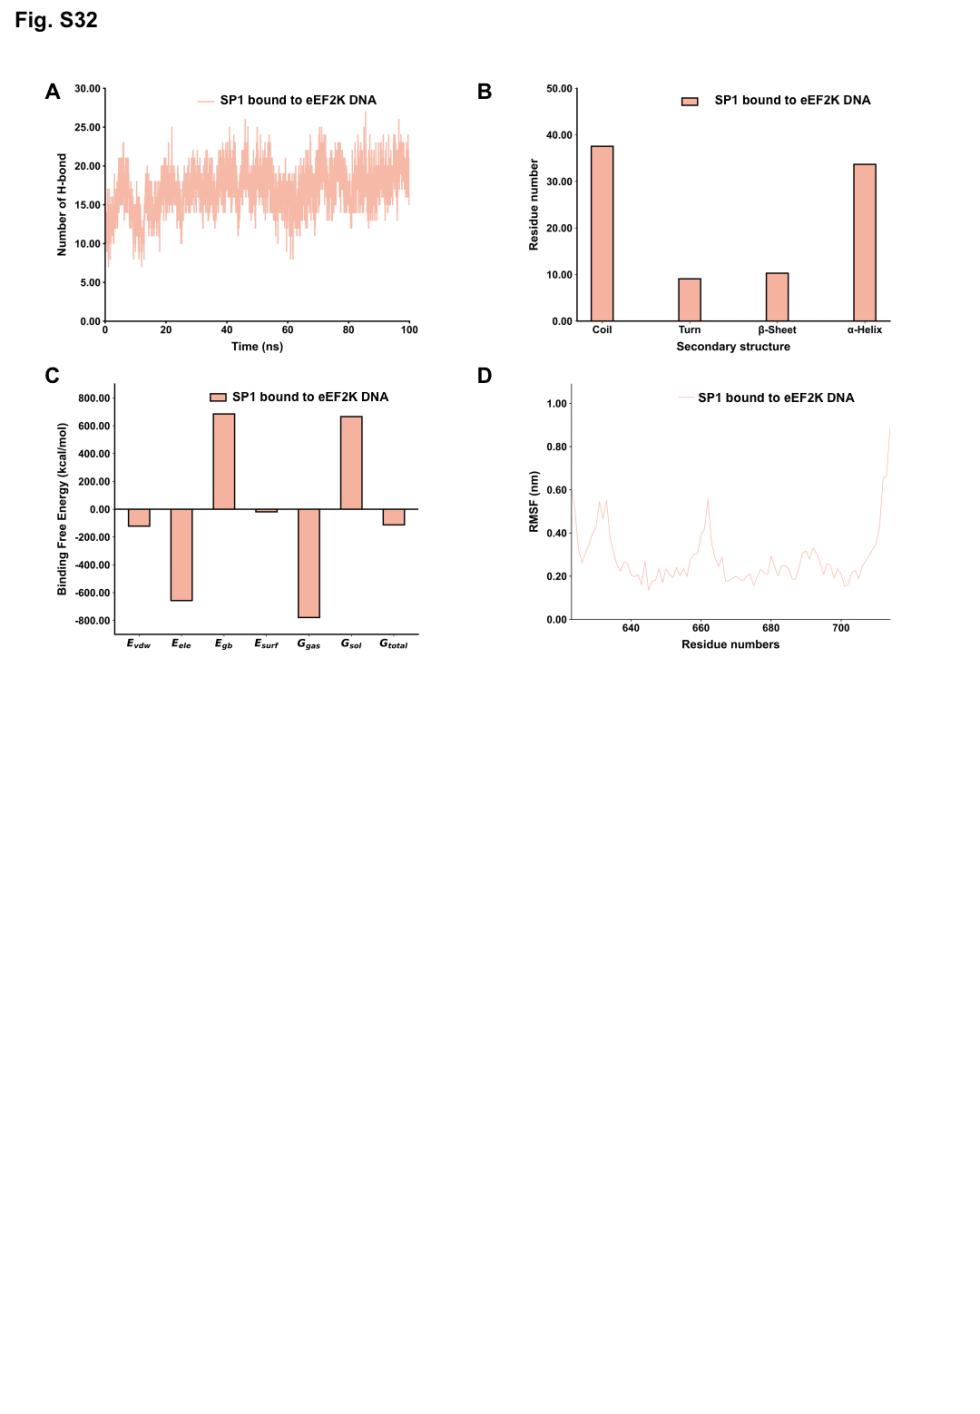


**Fig.S32. Thermodynamic and structural dynamics of the SP1 protein to eEF2K DNA promoter.** (**A**) Time evolution of the number of hydrogen bonds (NHB) formed between SP1 and the *eEF2K* promoter DNA, shown to assess the dynamic stability of the protein-DNA interface. (**B**) Average secondary-structure profiling showed that SP1 was dominated by coil and α-helical elements, with lower contributions from β-sheets and turns. (**C**) MM/GBSA calculations based on the molecular dynamics trajectory showed a favorable total binding free energy for the SP1-eEF2K promoter DNA complex. (**D**) RMSF analysis of SP1 in complex with eEF2K promoter DNA showed a non-uniform residue-wise fluctuation profile, indicating the presence of localized conformational flexibility within the bound SP1 structure. All the molecular dynamic (MD) simulation was performed under 100 ns.

**Fig.S33.**

**
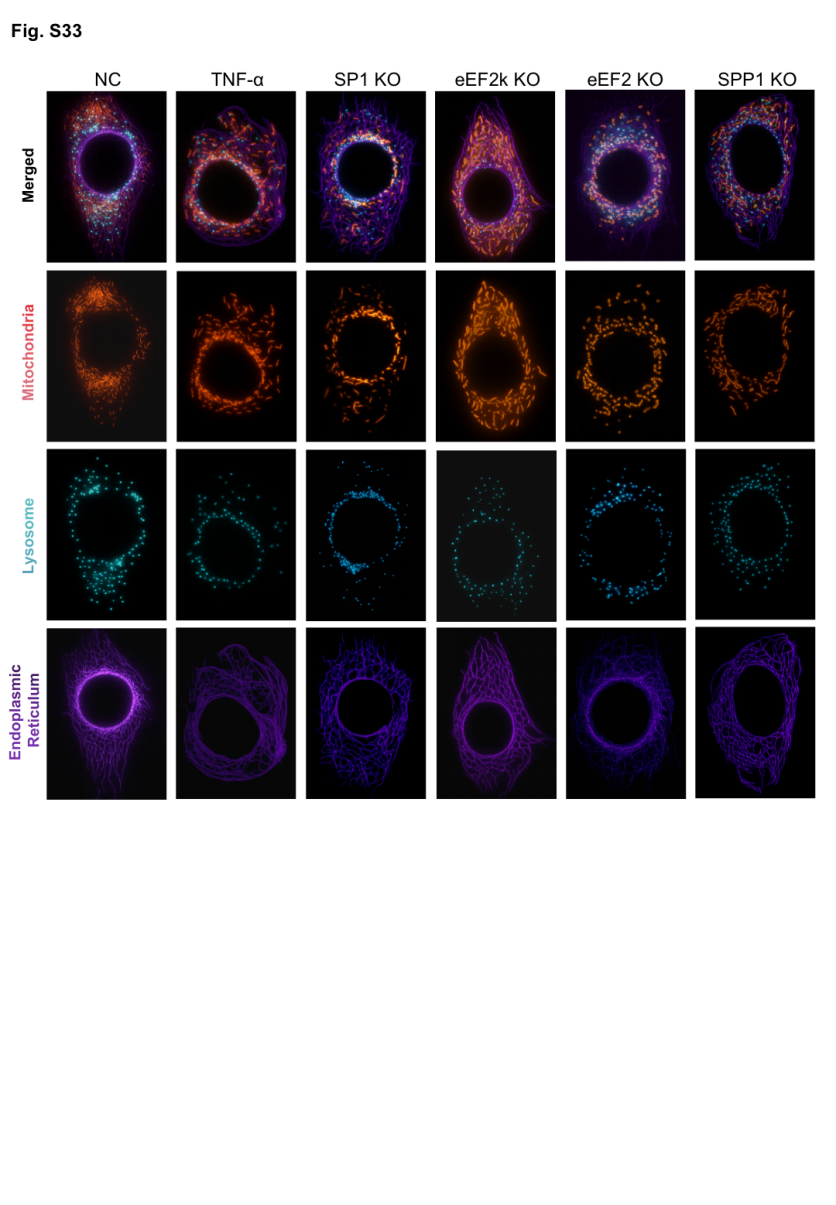
**

**Fig.S32. Spatial organization of degradative organelles in chondrocytes.** Representative HIS-SIM confocal images of autophagy-proteasome network that presented by lysosome, ER and mitochondria among normal chondrocytes, TNF-α induced cells, *SP1* KO-, *eEF2K* KO-, *eEF2* KO- and *SPP1* KO treated cells co-treated with TNF-α at 36hours.

**Fig.S34.**

**
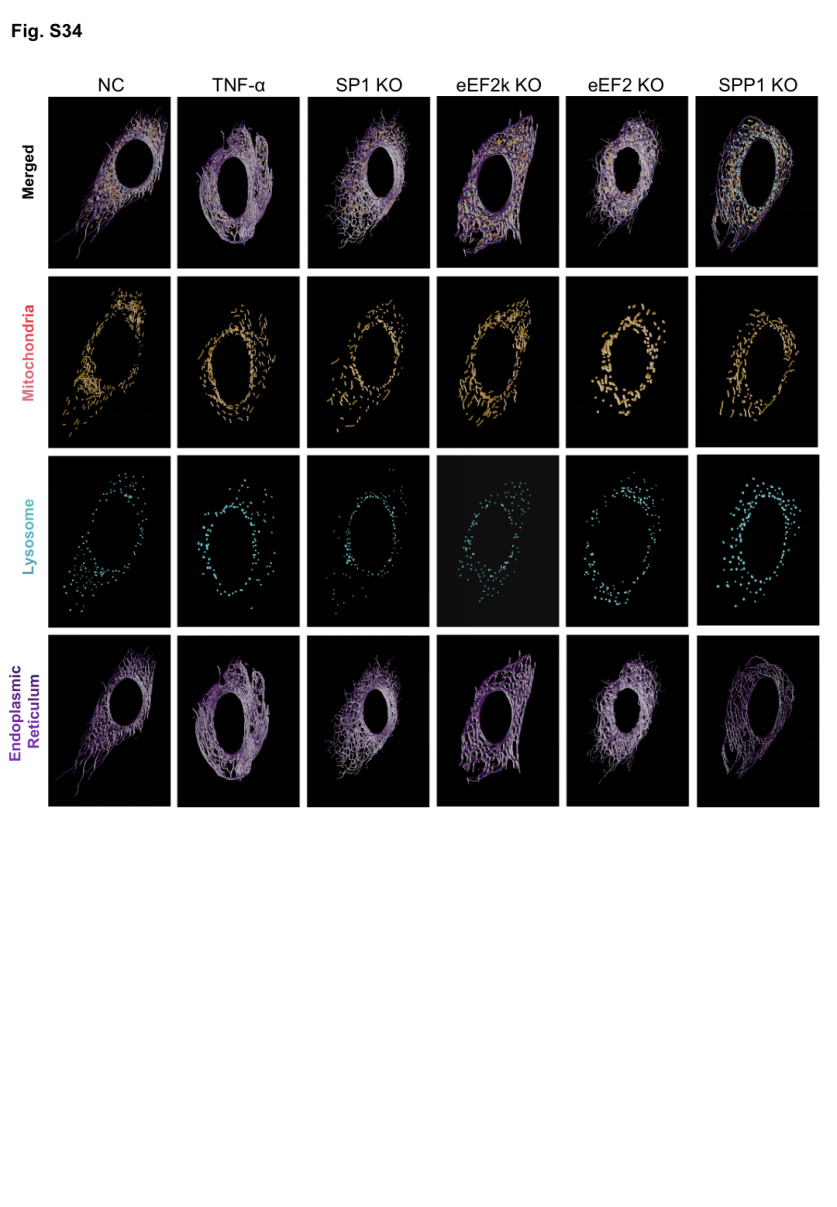
**

**Fig.S34. Spatial organization of degradative organelles in chondrocytes.** Representative 3D reconstruction of the autophagy-proteasome network that presented by lysosome, ER and mitochondria among normal chondrocytes, TNF-α induced cells, *SP1* KO-, *eEF2K* KO-, *eEF2* KO- and *SPP1* KO treated cells co-treated with TNF-α at 36hours.

**Fig.S35.**

**
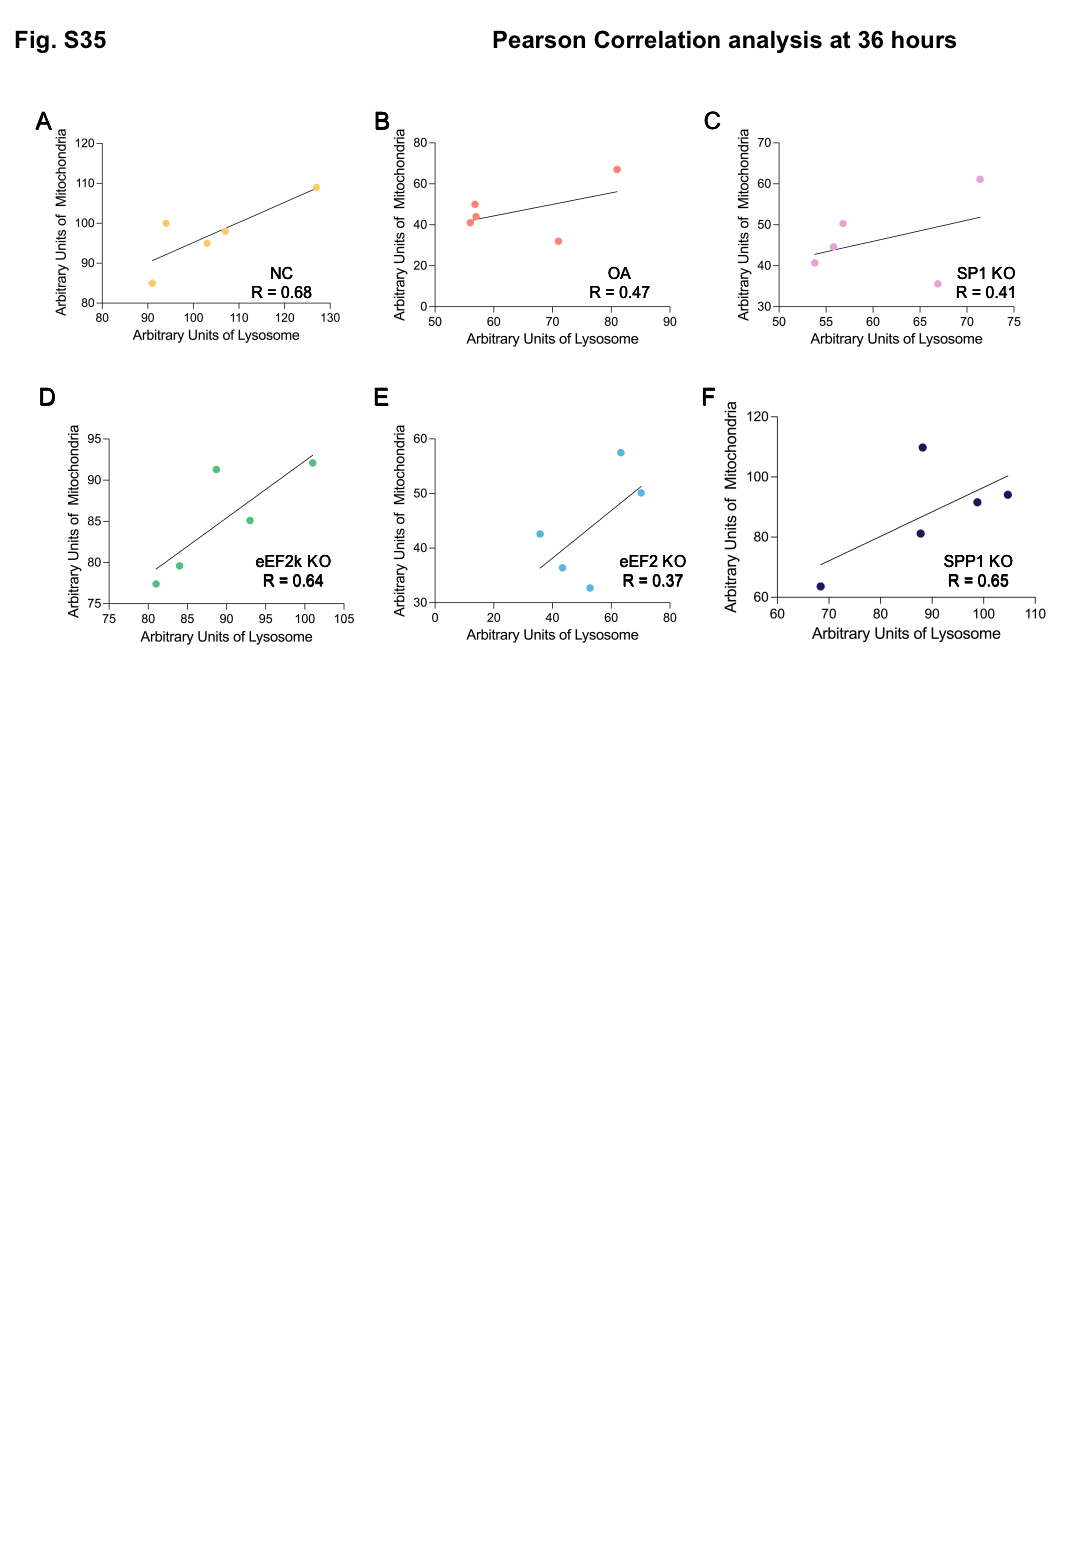
**

**Fig.S35.** Pearson’s correlation coefficients, reporting the organelle co-localization strength within (**A**) normal chondrocytes, (**B**) TNF-α induced OA model, (**C**) *SP1* KO chondrocytes under OA simulation, (**D**) *eEF2K* KO chondrocytes under OA simulation, (**E**) *eEF2* KO chondrocytes under OA simulation and (**F**) *SPP1* KO chondrocytes under OA simulation. Data were repeated for three times (n = 3) and presented as mean ± SD. Statistical significance was calculated using one-way ANOVA. * *p* < 0.05, ** *p* < 0.01, *** *p* < 0.001, and ns represented no significant difference.

**Fig.S36.**


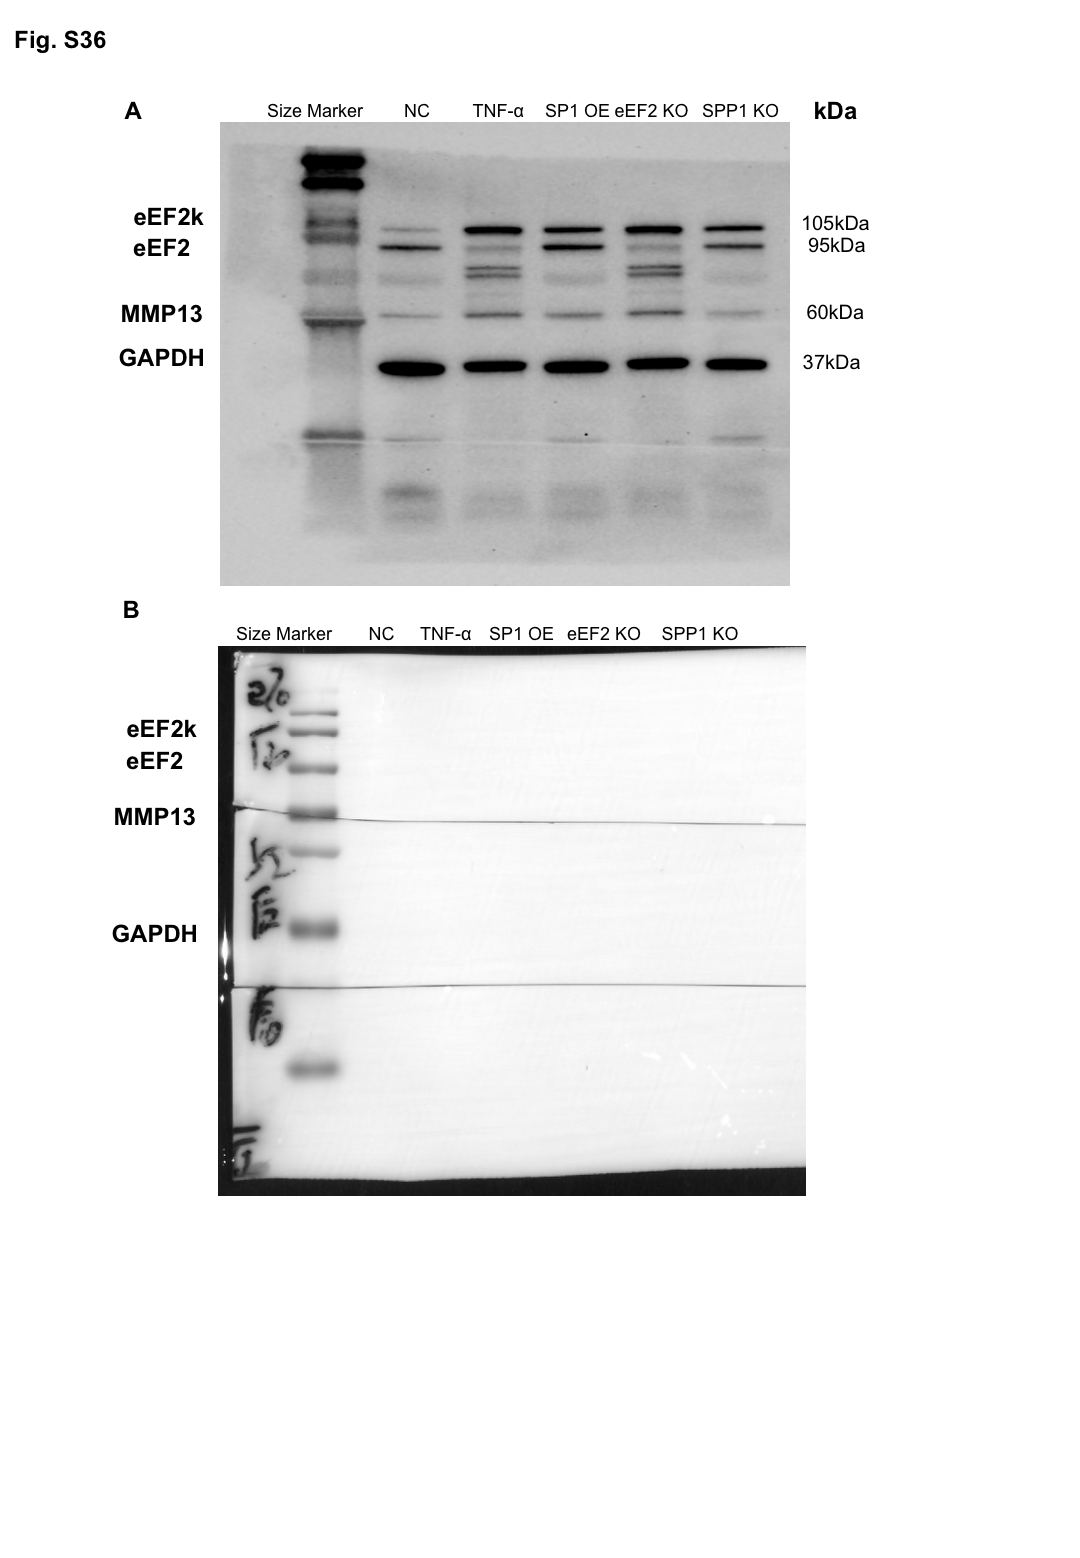


**Fig.S36. Original western blot membrane of cells treated with different treatments.**

**Fig.S37.**


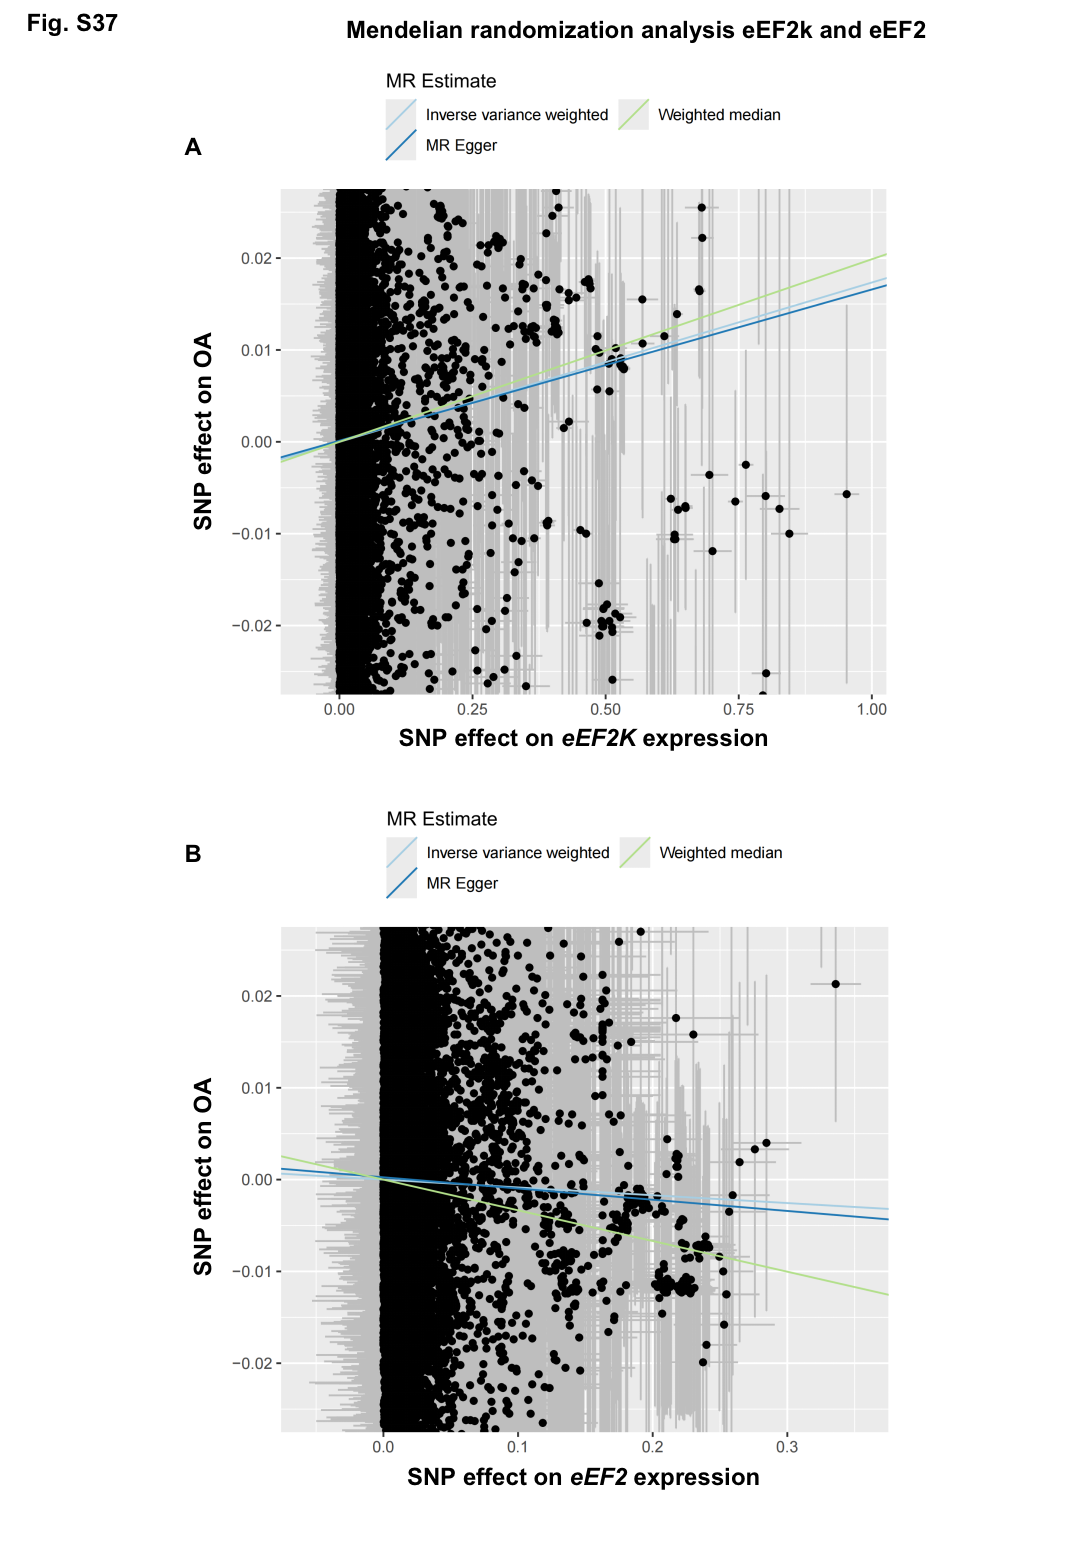


**Fig.S37. Mendelian randomization (MR) analysis eEF2K and eEF2 with tissue degeneration risk at the population level.** (**A**) Two-sample MR analysis of genetically predicted *eEF2K* mRNA expression in OA. (**B**) Two-sample MR analysis of genetically predicted *eEF2* mRNA expression in OA.

**Fig.S38.**


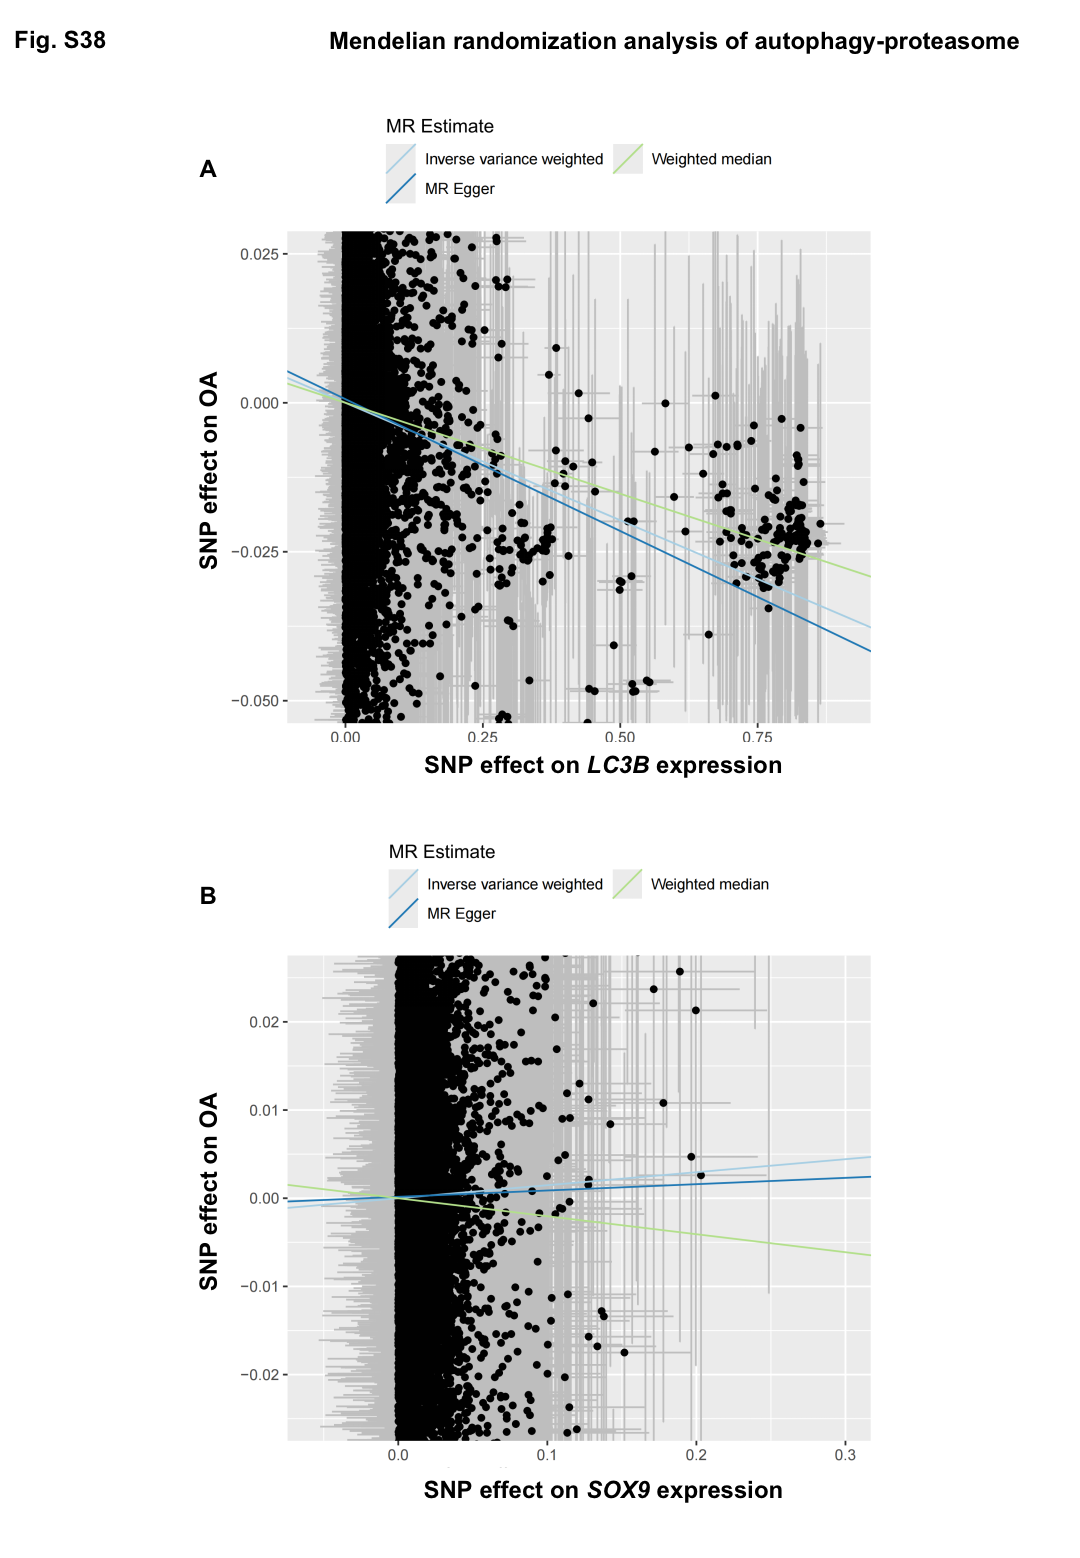


**Fig.S38. Mendelian randomization (MR) analysis *LB3B* and *SOX9* with tissue degeneration risk at the population level.** (**A**) Two-sample MR analysis of genetically predicted *LC3B* mRNA expression in OA. (**B**) Two-sample MR analysis of genetically predicted *SOX9* mRNA expression in OA.
